# Supplementary material for: Proximity proteomics in a marine diatom reveals a putative cell surface-to-chloroplast iron trafficking pathway
Source: eLife journal article supplement (doi:10.7554/elife.52770), 2021-02-16
Supplement: supp [file elife-52770-supp-v1.zip]

A

## Signal peptide

MFSFKSFVFAALLSSCEASVRARKLSNELIAGFEPRTVVTDHNAIDLDAQKIEDLLATPSTDTFSSARDVYEQGSHS  
 KSFAVLTLDPALTVAVPEGTVISGKNEDGSTVSGTALKSYSVGDTTIEIQYSTGNTQATYVDCQVGGNPDNPTSGCF  
 AANGTVTISGSSGSLPYSYDPLVNNDNGRTIQGFSTAAETRFRPSGGGELFPDFQKFFDY YGTLTYADEWVQSAFAR  
 RSTSFSGKDADF SKYGDDGILQAVKKG TAYISIAMYVIRELEDALDDCDRGCDTADCND DAVHALDEAVAFWTGSLE  
 GKDGSGSGVLMYGLADTRCINFKTCGRNGDEASGKSKVNFEIFRHFDTMQREL TNKRCNSARATKEKIVPMMIVPLI  
 QGVLR YAYIIENDGFTEKAEAE GATFAAAVLPYVASCNAEDA KTIYDNMRVGLGGGASYSTVFDAFVRQSSCMGISC  
 SDIGGYWNEAQGAYEEGAGPCGGSGSGDDGANVGLAVGLSIGLLVLVLLGVLLRRRRSASGSTVEFKDTGSTPI\*

Transmembrane  
domain

Tail  
domain

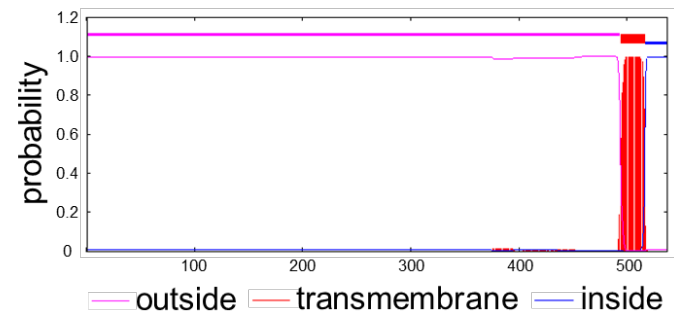

B

pTF-APEX2

WT

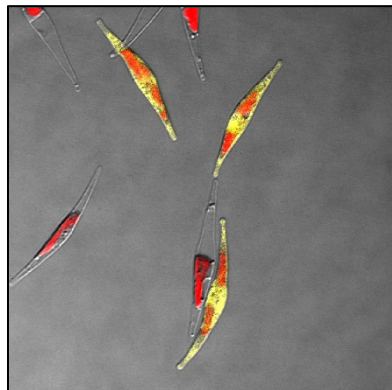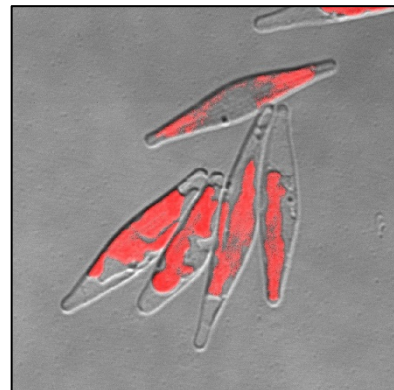

C

Amplex UltraRed  
H<sub>2</sub>O<sub>2</sub>

|   |   |   |   |   |   |
|---|---|---|---|---|---|
| + | + | - | + | + | + |
| + | - | + | + | + | + |

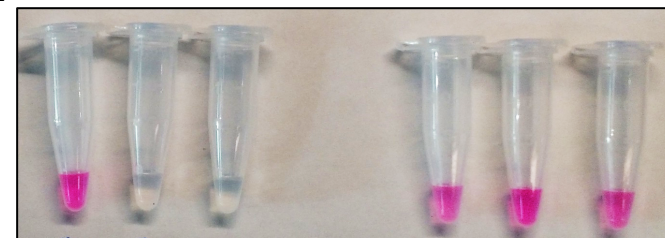

s3

s1 s2 s4
