# Supplementary material for: Proximity proteomics in a marine diatom reveals a putative cell surface-to-chloroplast iron trafficking pathway
Source: eLife journal article supplement (doi:10.7554/elife.52770), 2021-02-16
Supplement: supp [file elife-52770-supp-v1.zip]

A

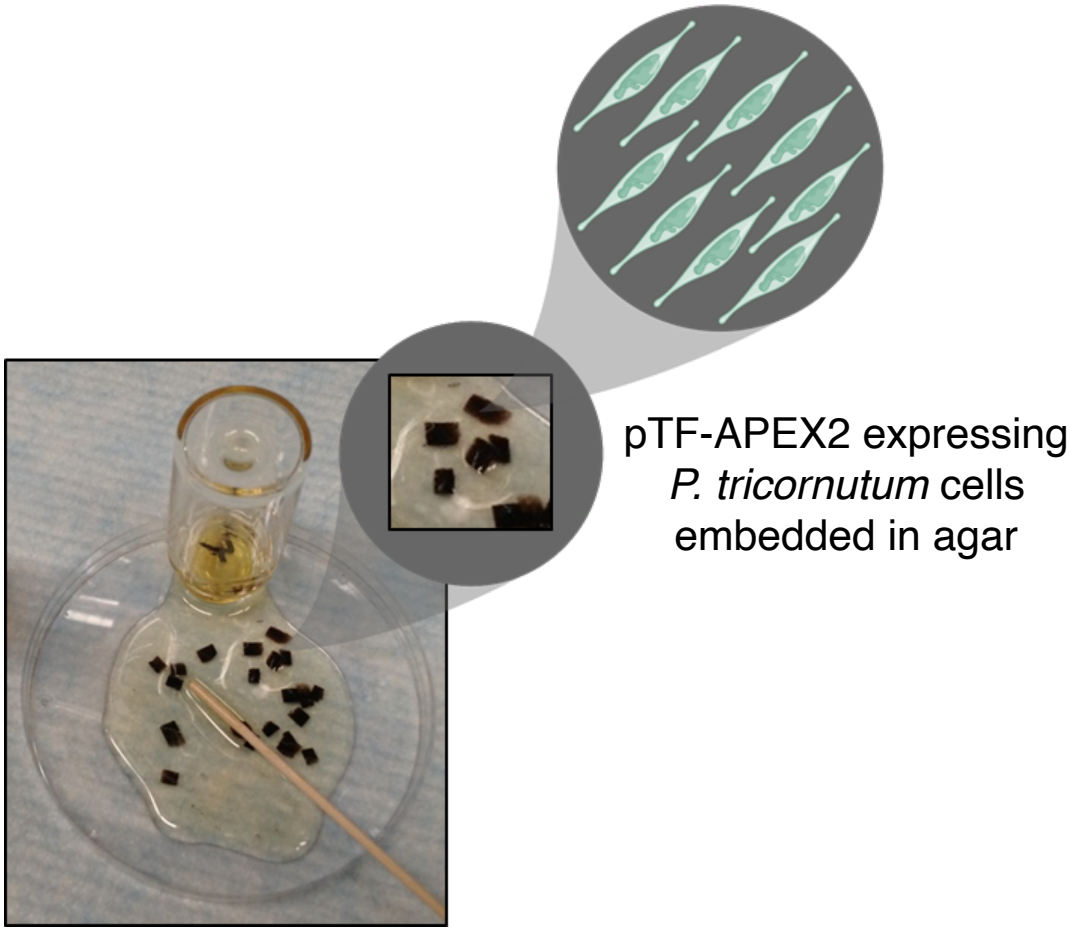

B

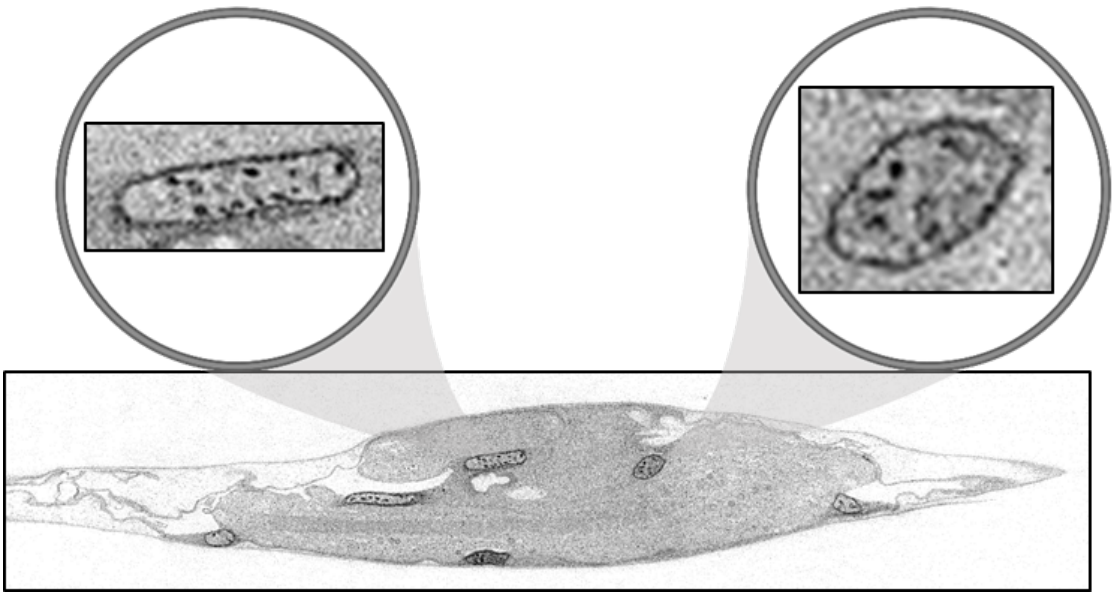

C

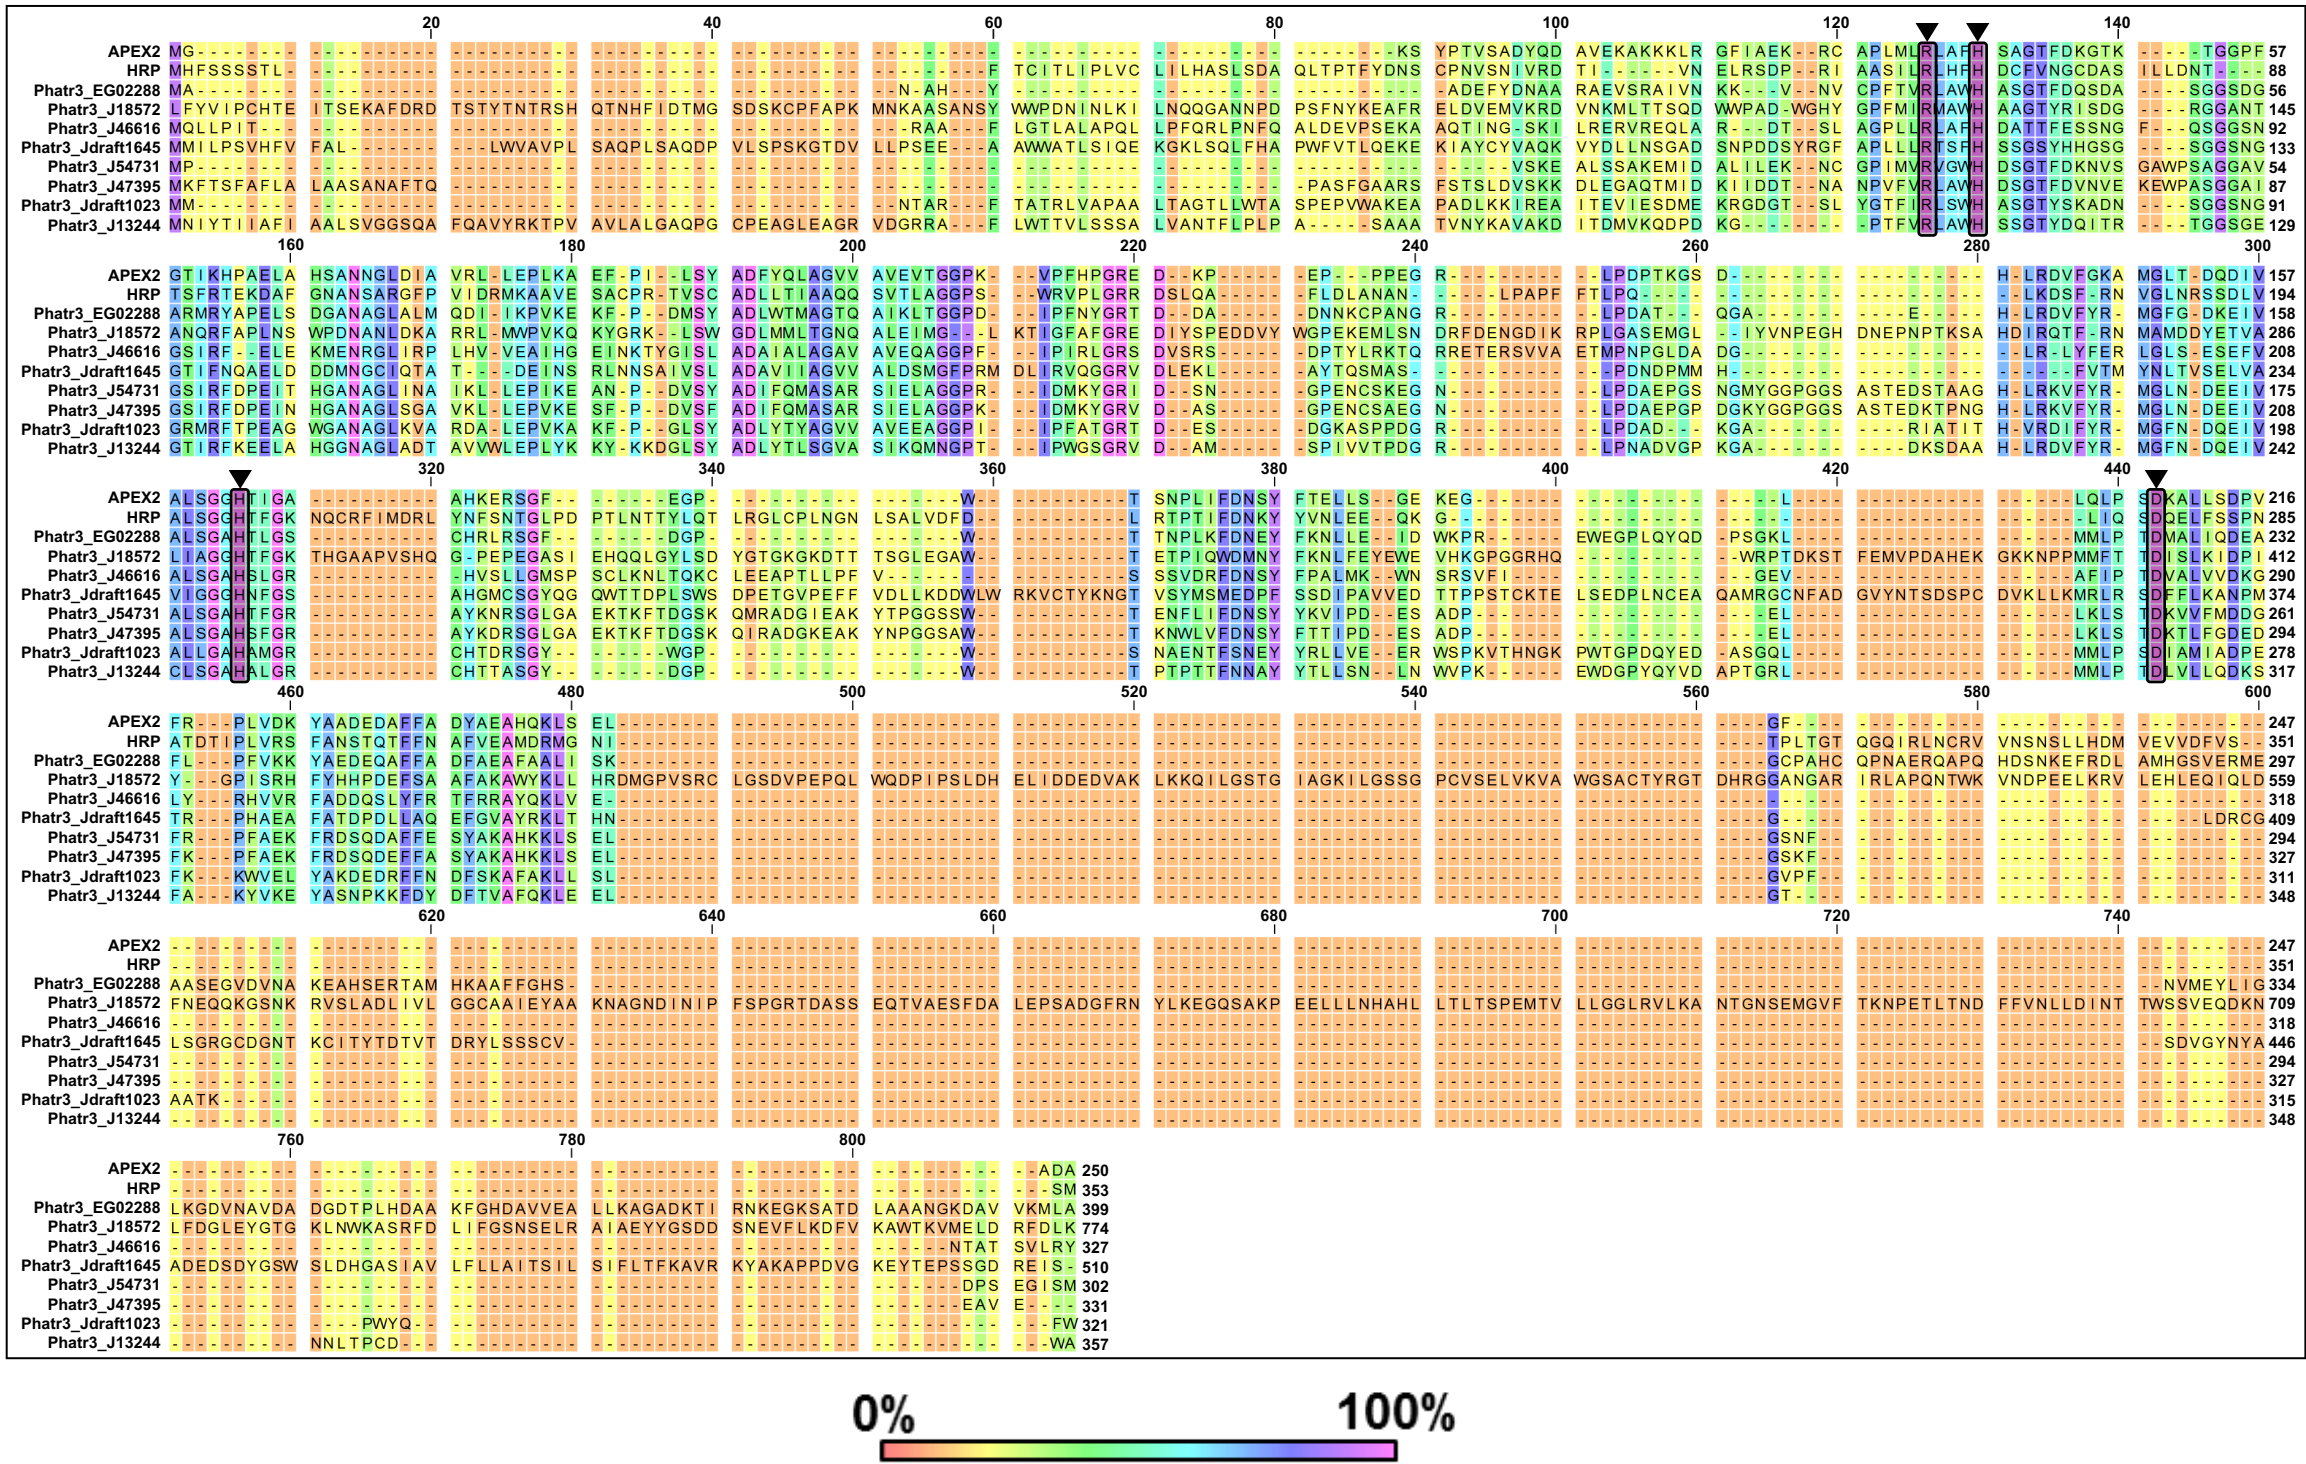

D

|                     |          |
|---------------------|----------|
| → Phatr3_J18572     | KRPLGASE |
| HRP                 | PAPFF--- |
| → Phatr3_Jdraft1645 | ASPDN--- |
| → Phatr3_J46616     | PNPGL--- |
| Phatr3_J54731       | PDAEP--G |
| Phatr3_J47395       | PDAEP--G |
| Phatr3_J13244       | PNADV--G |
| → Phatr3_Jdraft1023 | PDADK--G |
| Phatr3_EG02288      | PDATQ--G |
| APEX2               | PDPTK--G |

E

| Ensembl ID        | Peroxidase class <sup>1</sup> | Position 134 relative to APEX2 <sup>2</sup> | Predicted localization <sup>3</sup> | Number of transmembrane domains <sup>4</sup> |
|-------------------|-------------------------------|---------------------------------------------|-------------------------------------|----------------------------------------------|
| Phatr3_J18572     | I                             | Pro                                         | cytosol                             | /                                            |
| Phatr3_Jdraft1645 | I                             | Pro                                         | secretory pathway                   | 1                                            |
| Phatr3_J46616     | I                             | Pro                                         | secretory pathway                   | /                                            |
| Phatr3_J54731     | I                             | Ala                                         | cytosol                             | /                                            |
| Phatr3_J47395     | I                             | Ala                                         | secretory pathway                   | /                                            |
| Phatr3_J13244     | I                             | Ala                                         | secretory pathway                   | /                                            |
| Phatr3_Jdraft1023 | I                             | Ala                                         | mitochondria                        | /                                            |
| Phatr3_EG02288    | I                             | Ala                                         | cytosol                             | /                                            |
