# Supplementary figures and images for: Proximity proteomics in a marine diatom reveals a putative cell surface-to-chloroplast iron trafficking pathway
Source: eLife journal article supplement (doi:10.7554/elife.52770), 2021-02-16

**A**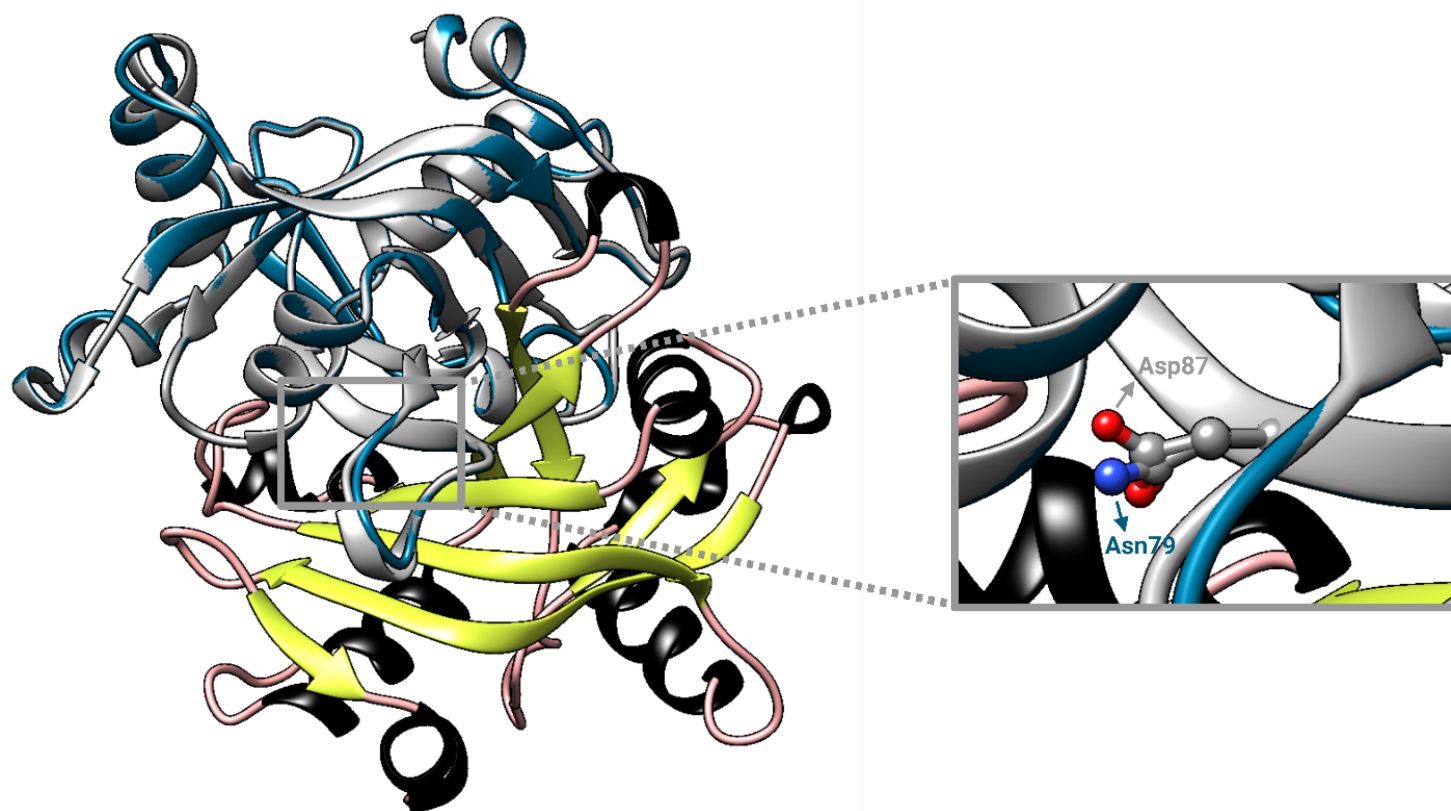**B**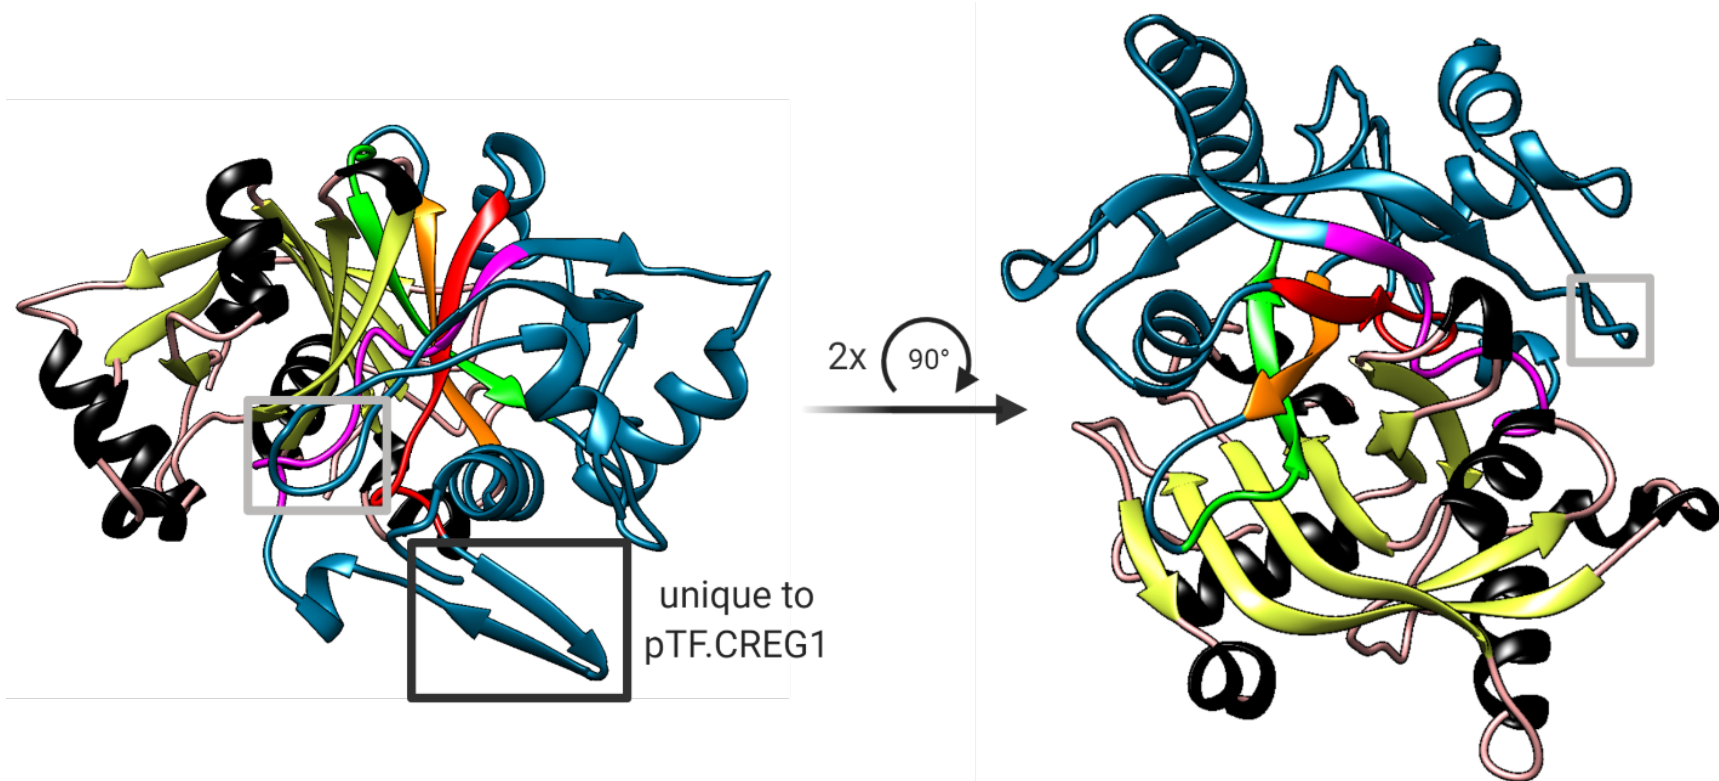

Supplement: supp [file elife-52770-supp-v1.zip]

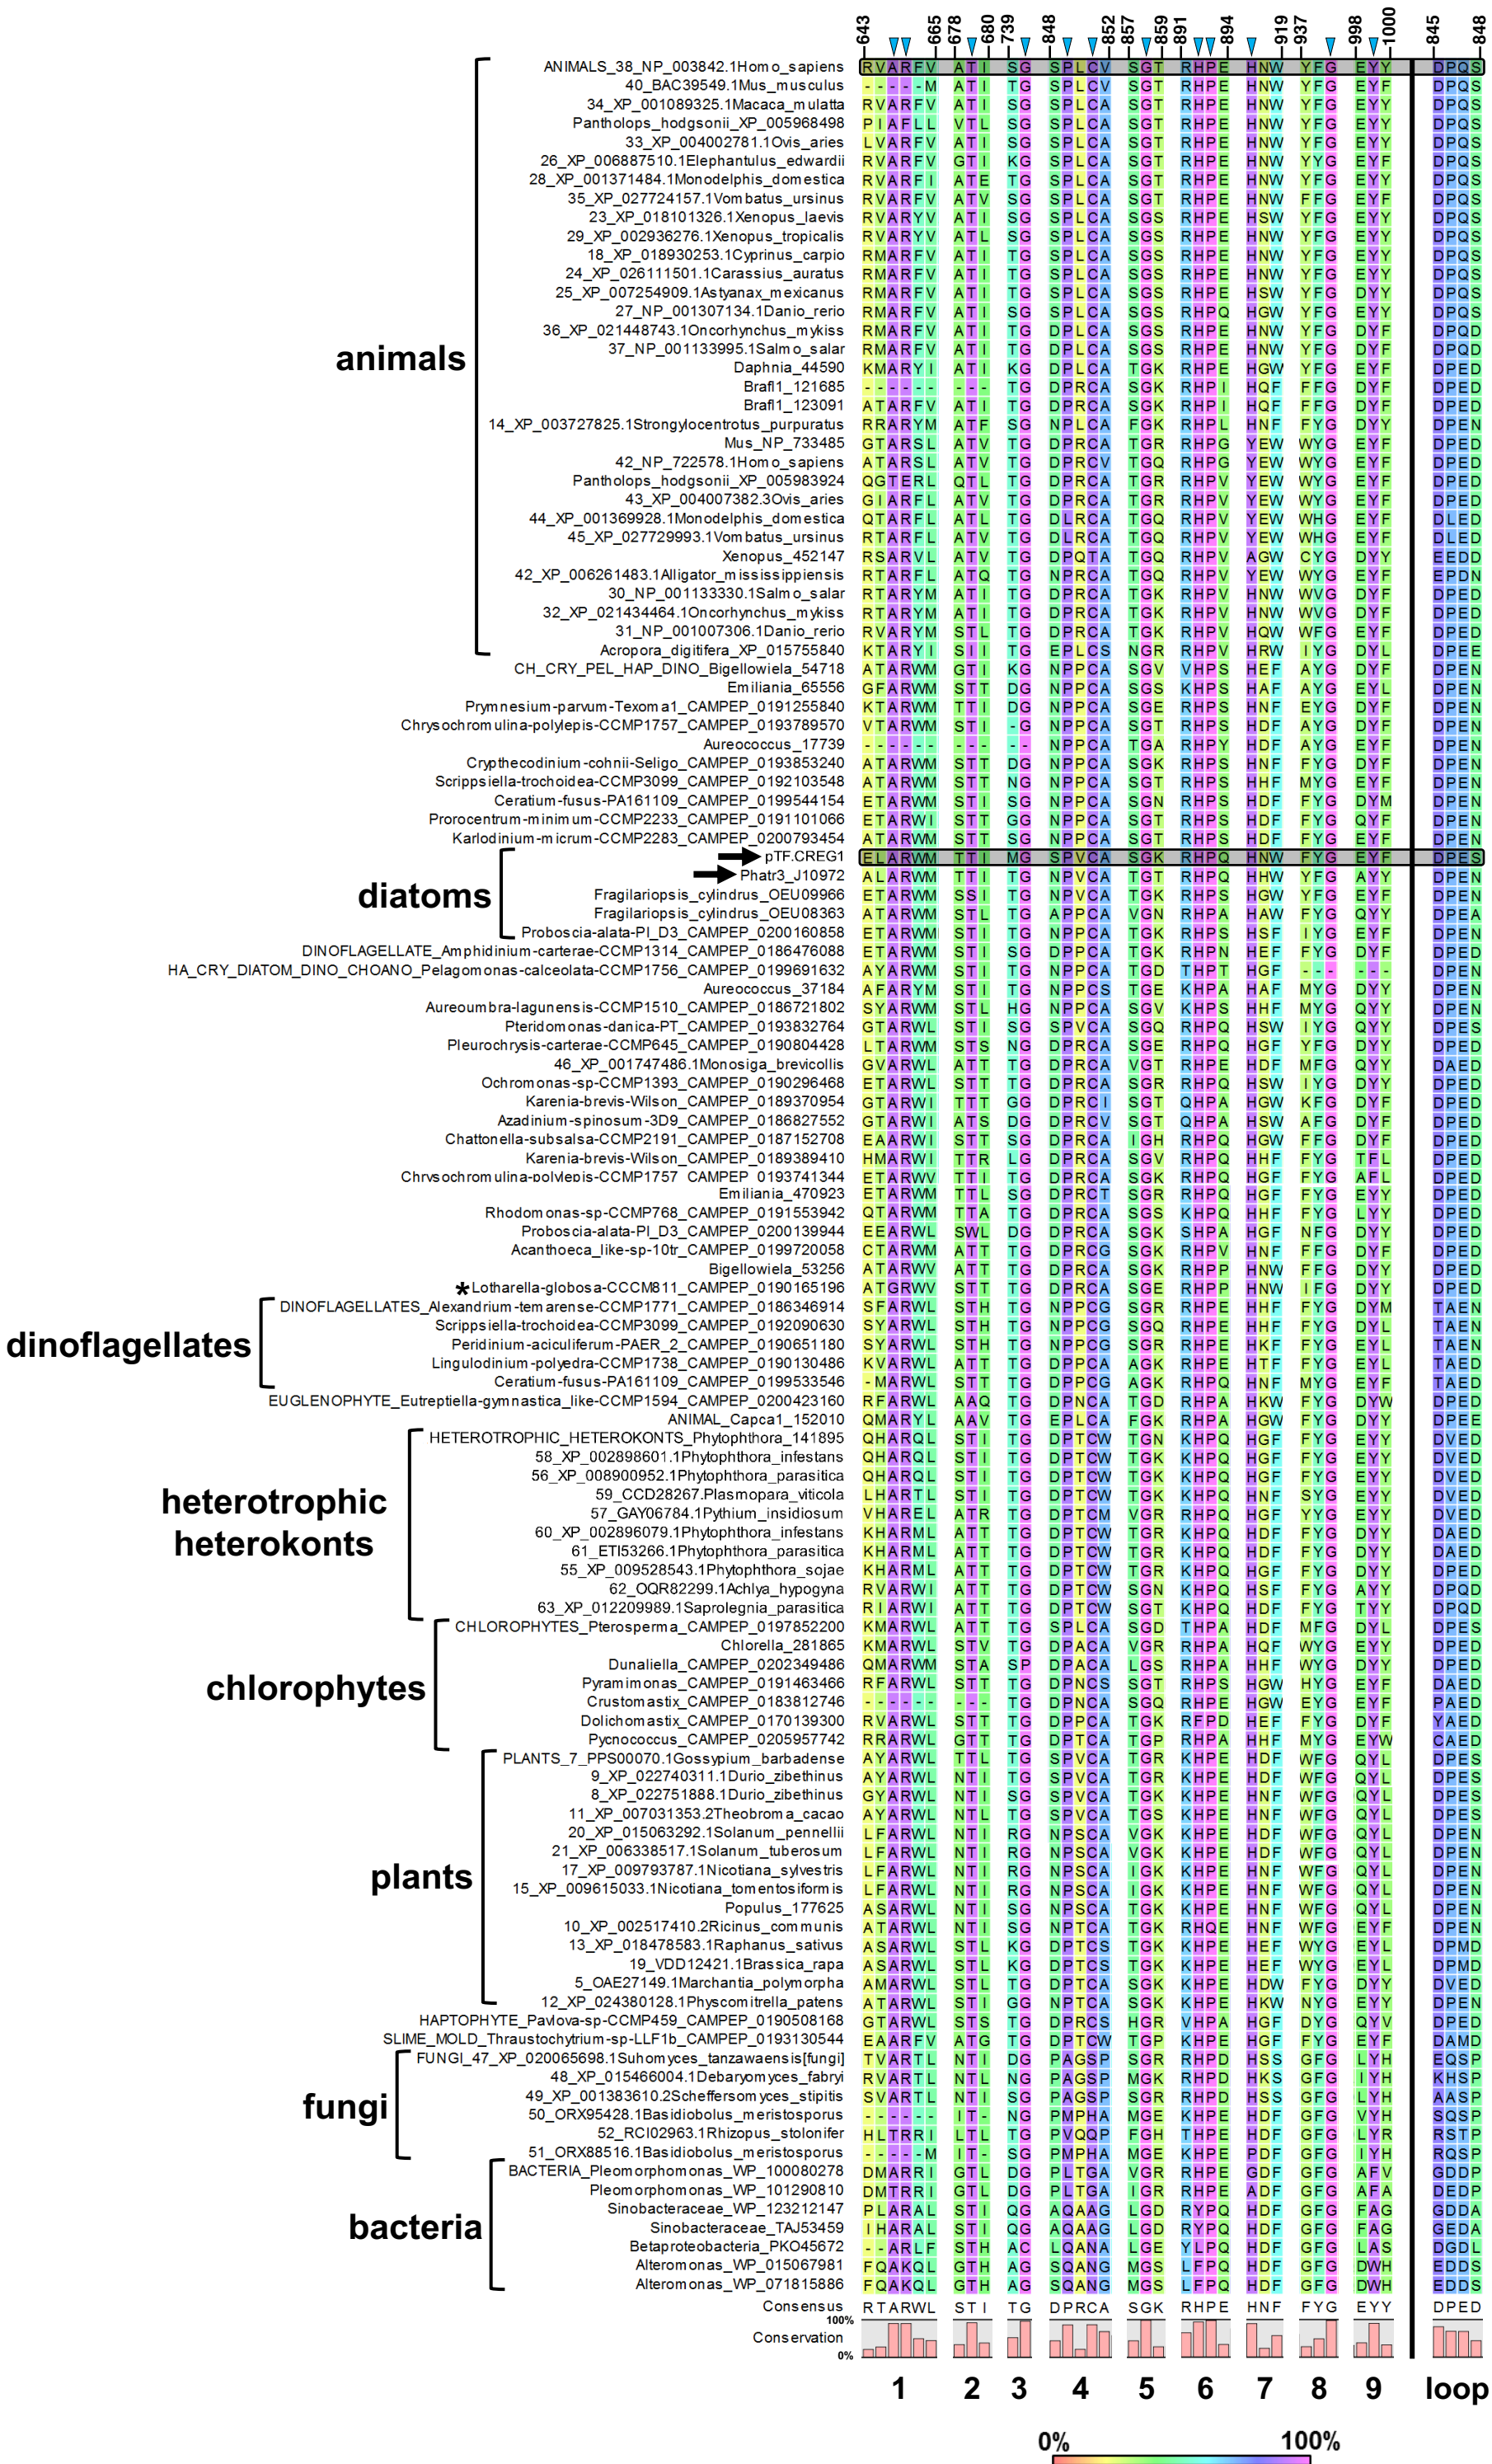

Supplement: supp [file elife-52770-supp-v1.zip]

A

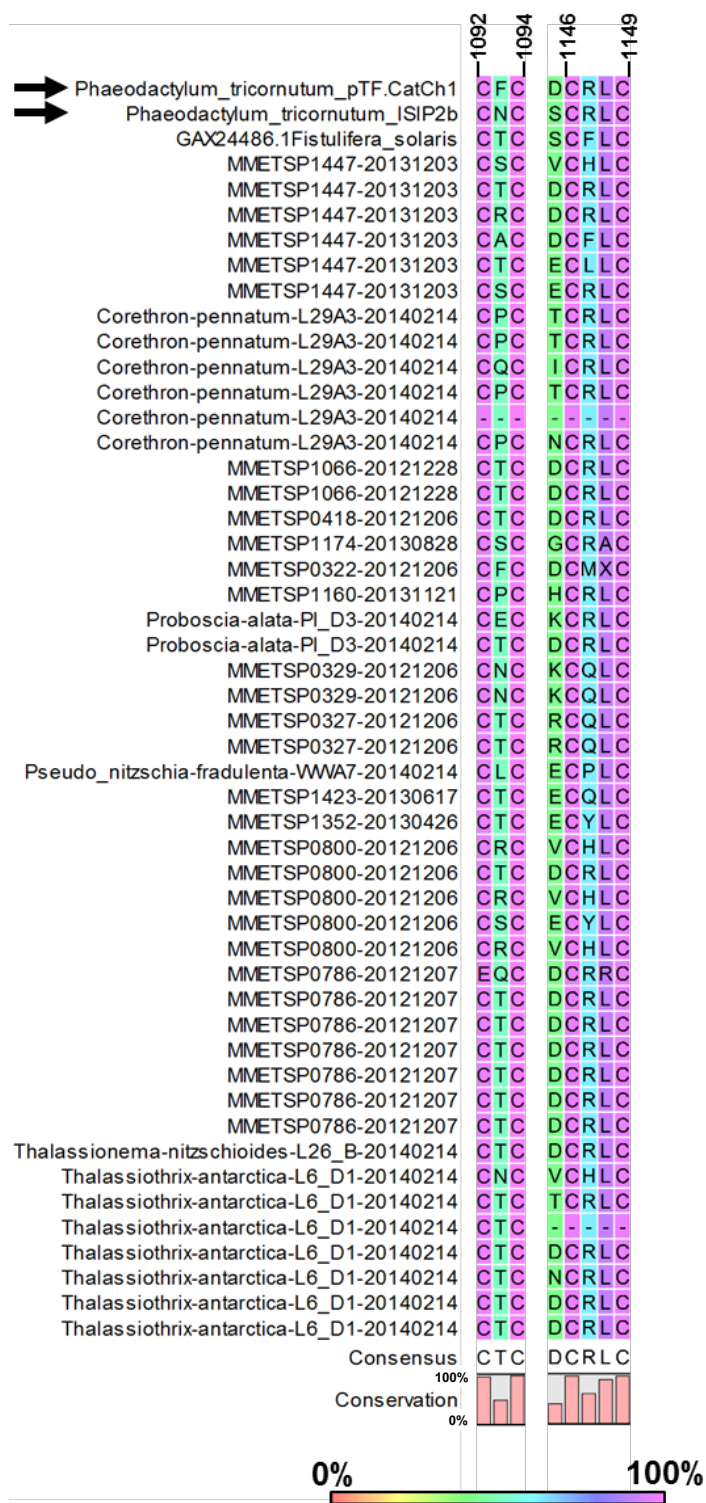

B

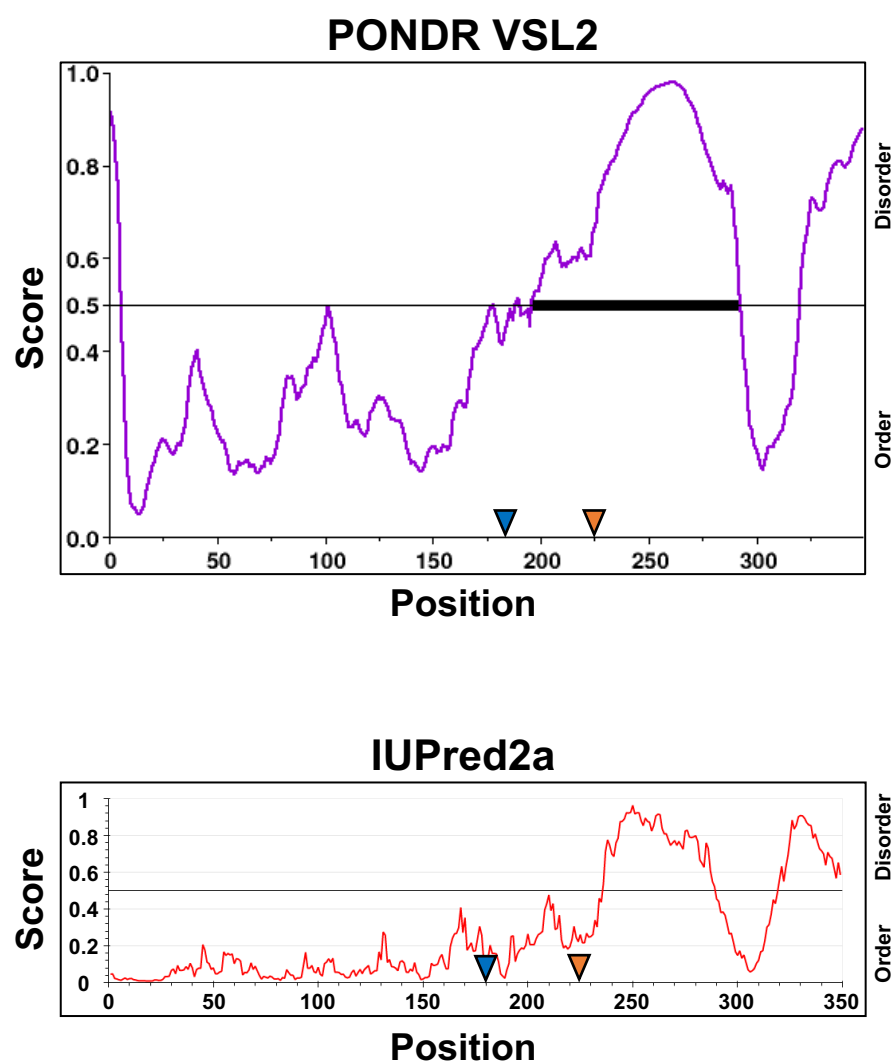

C

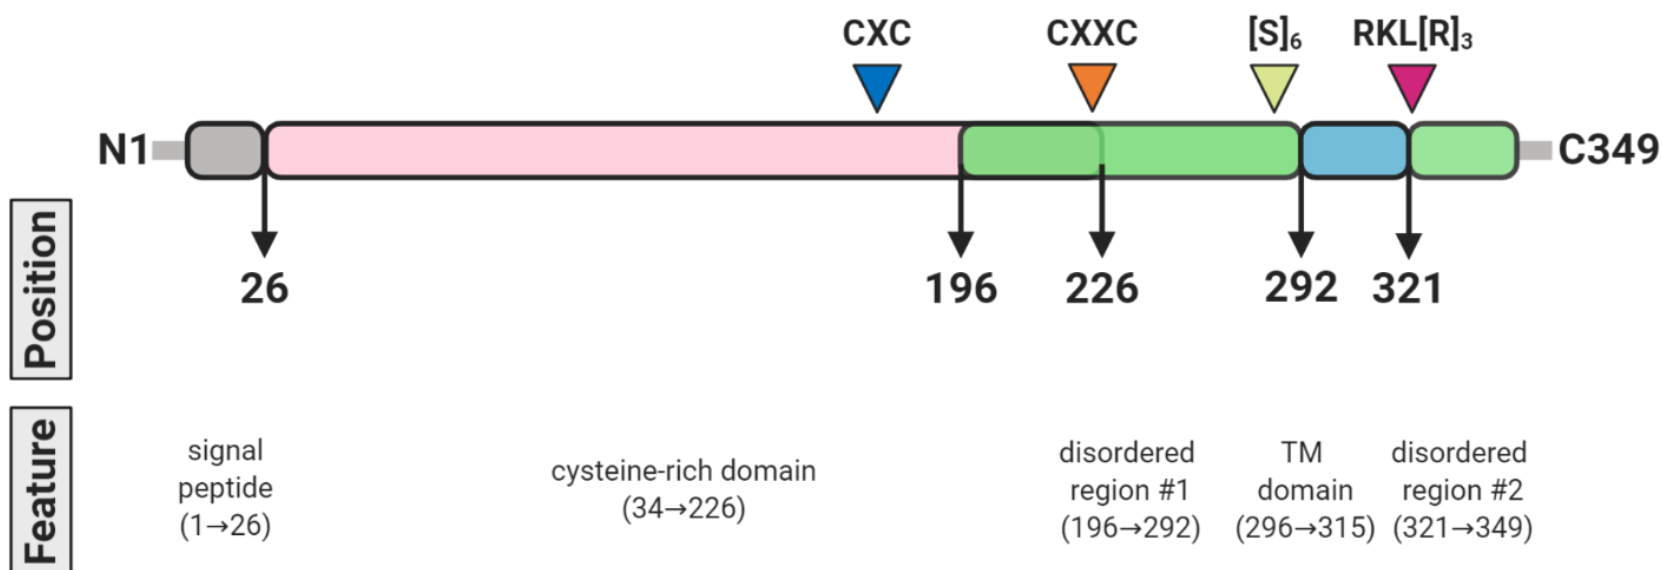

Supplement: supp [file elife-52770-supp-v1.zip]

**A**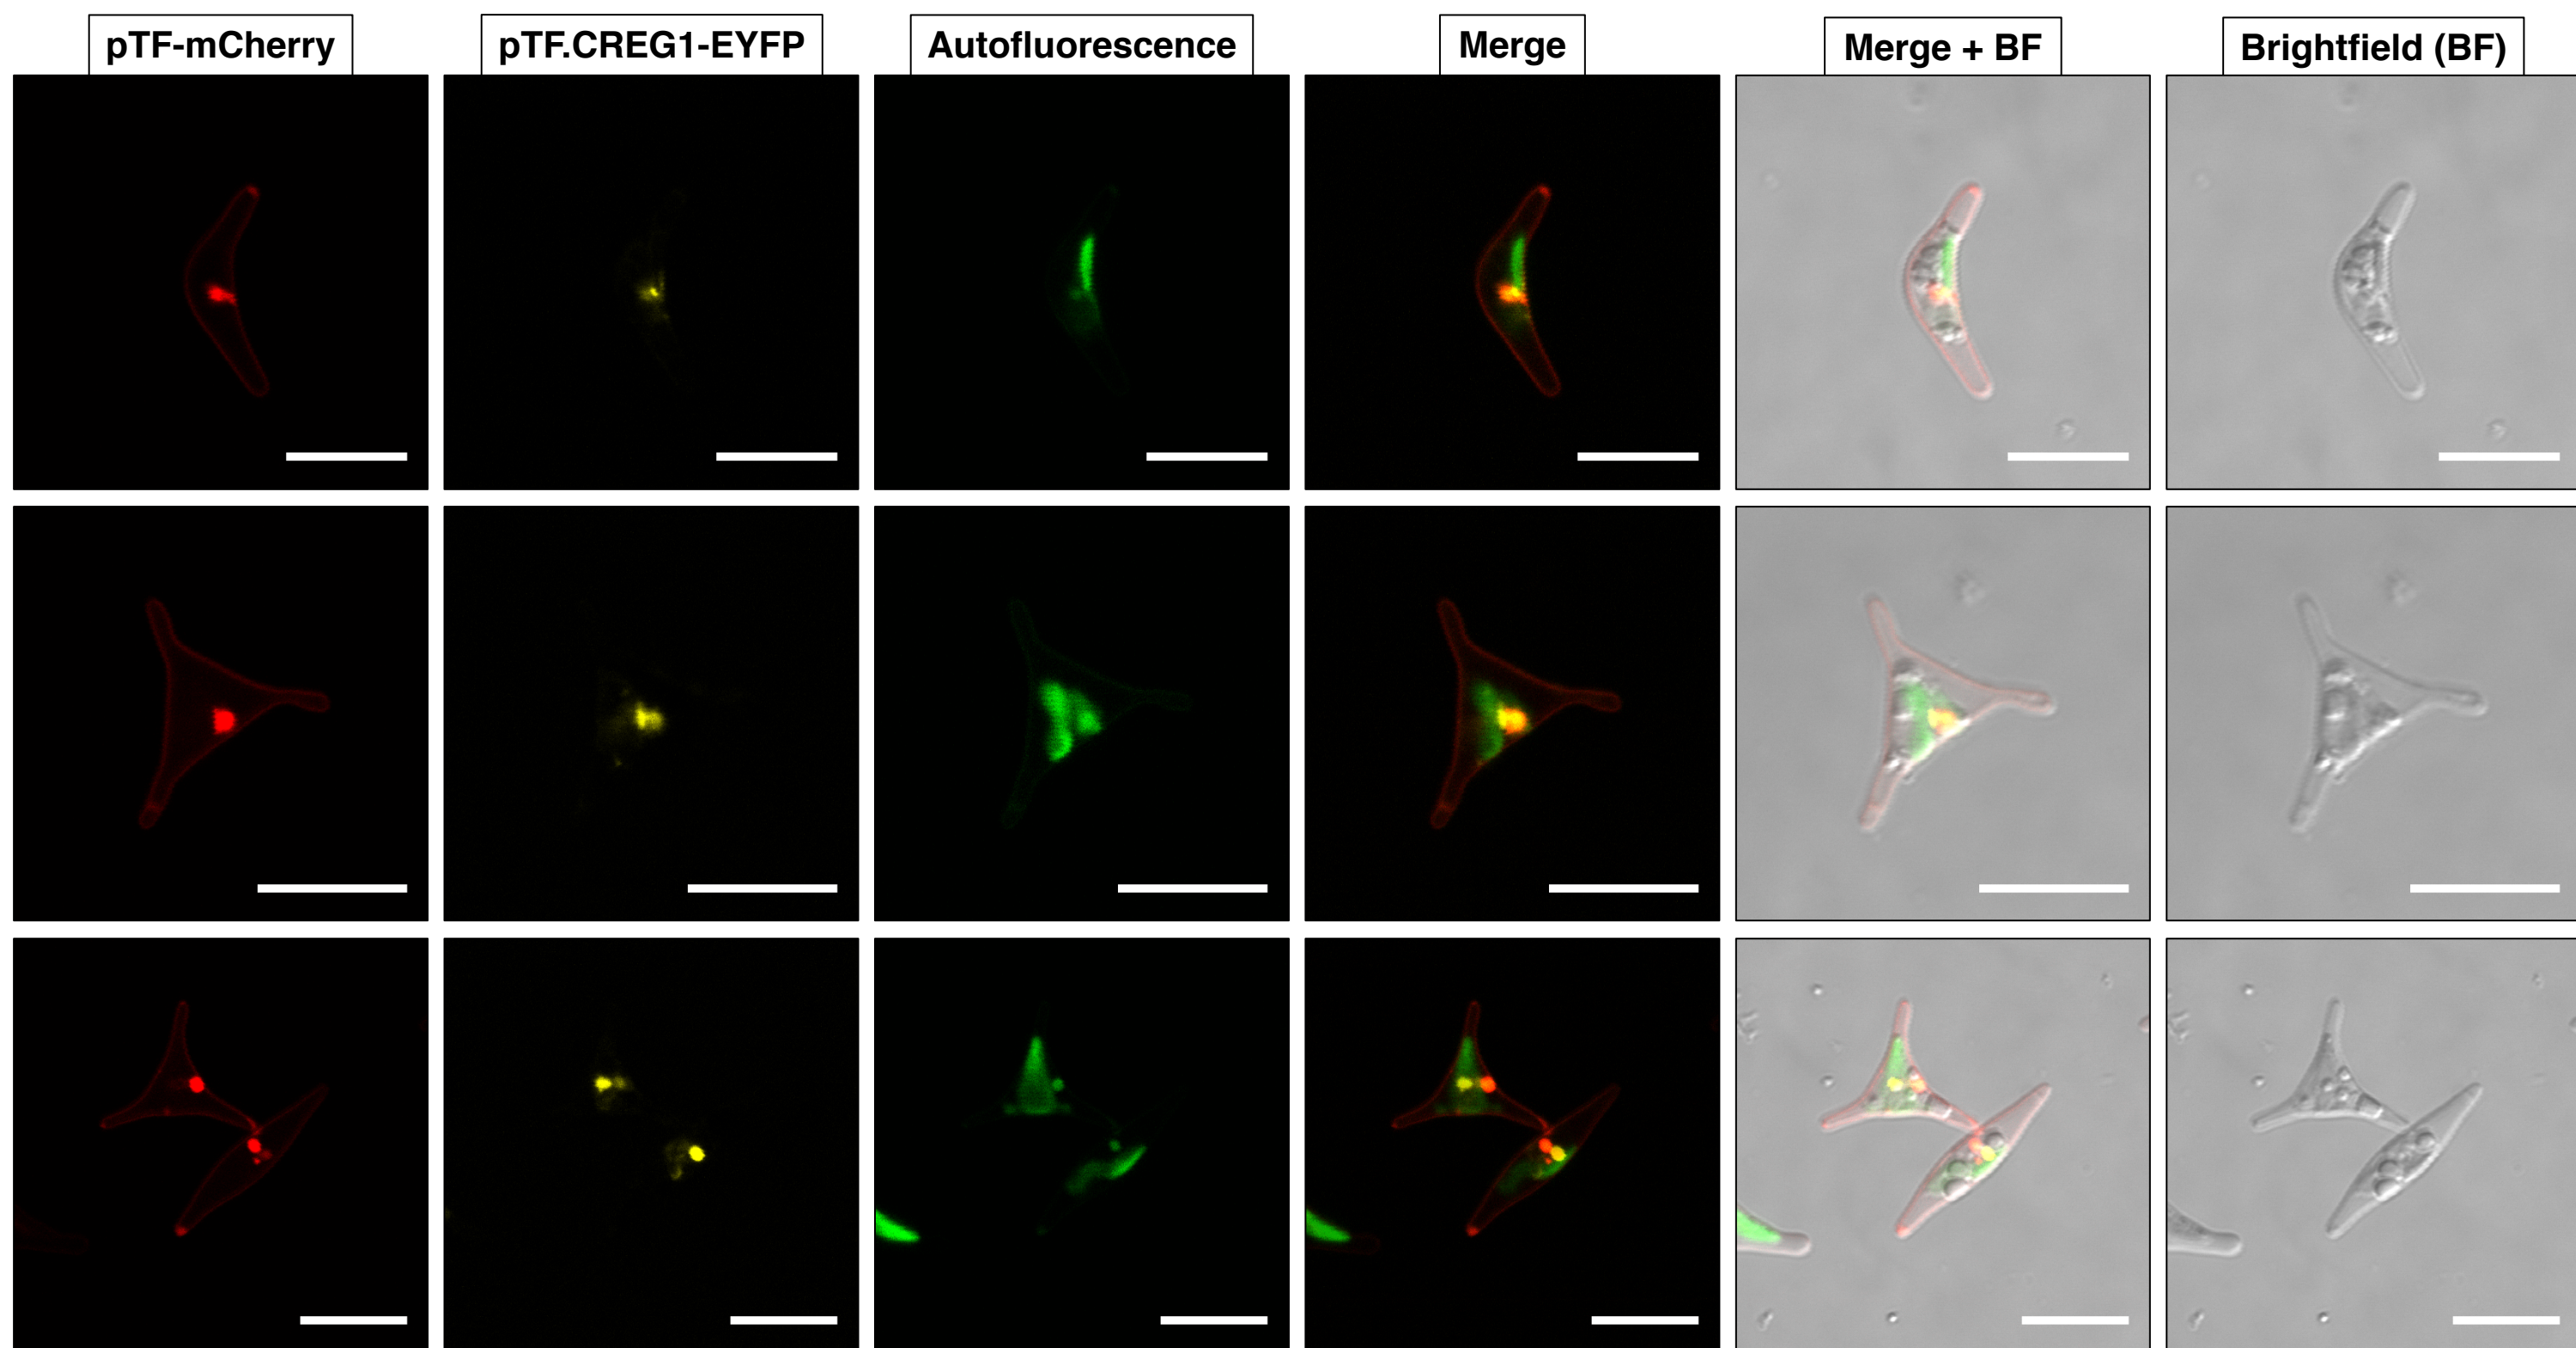**B**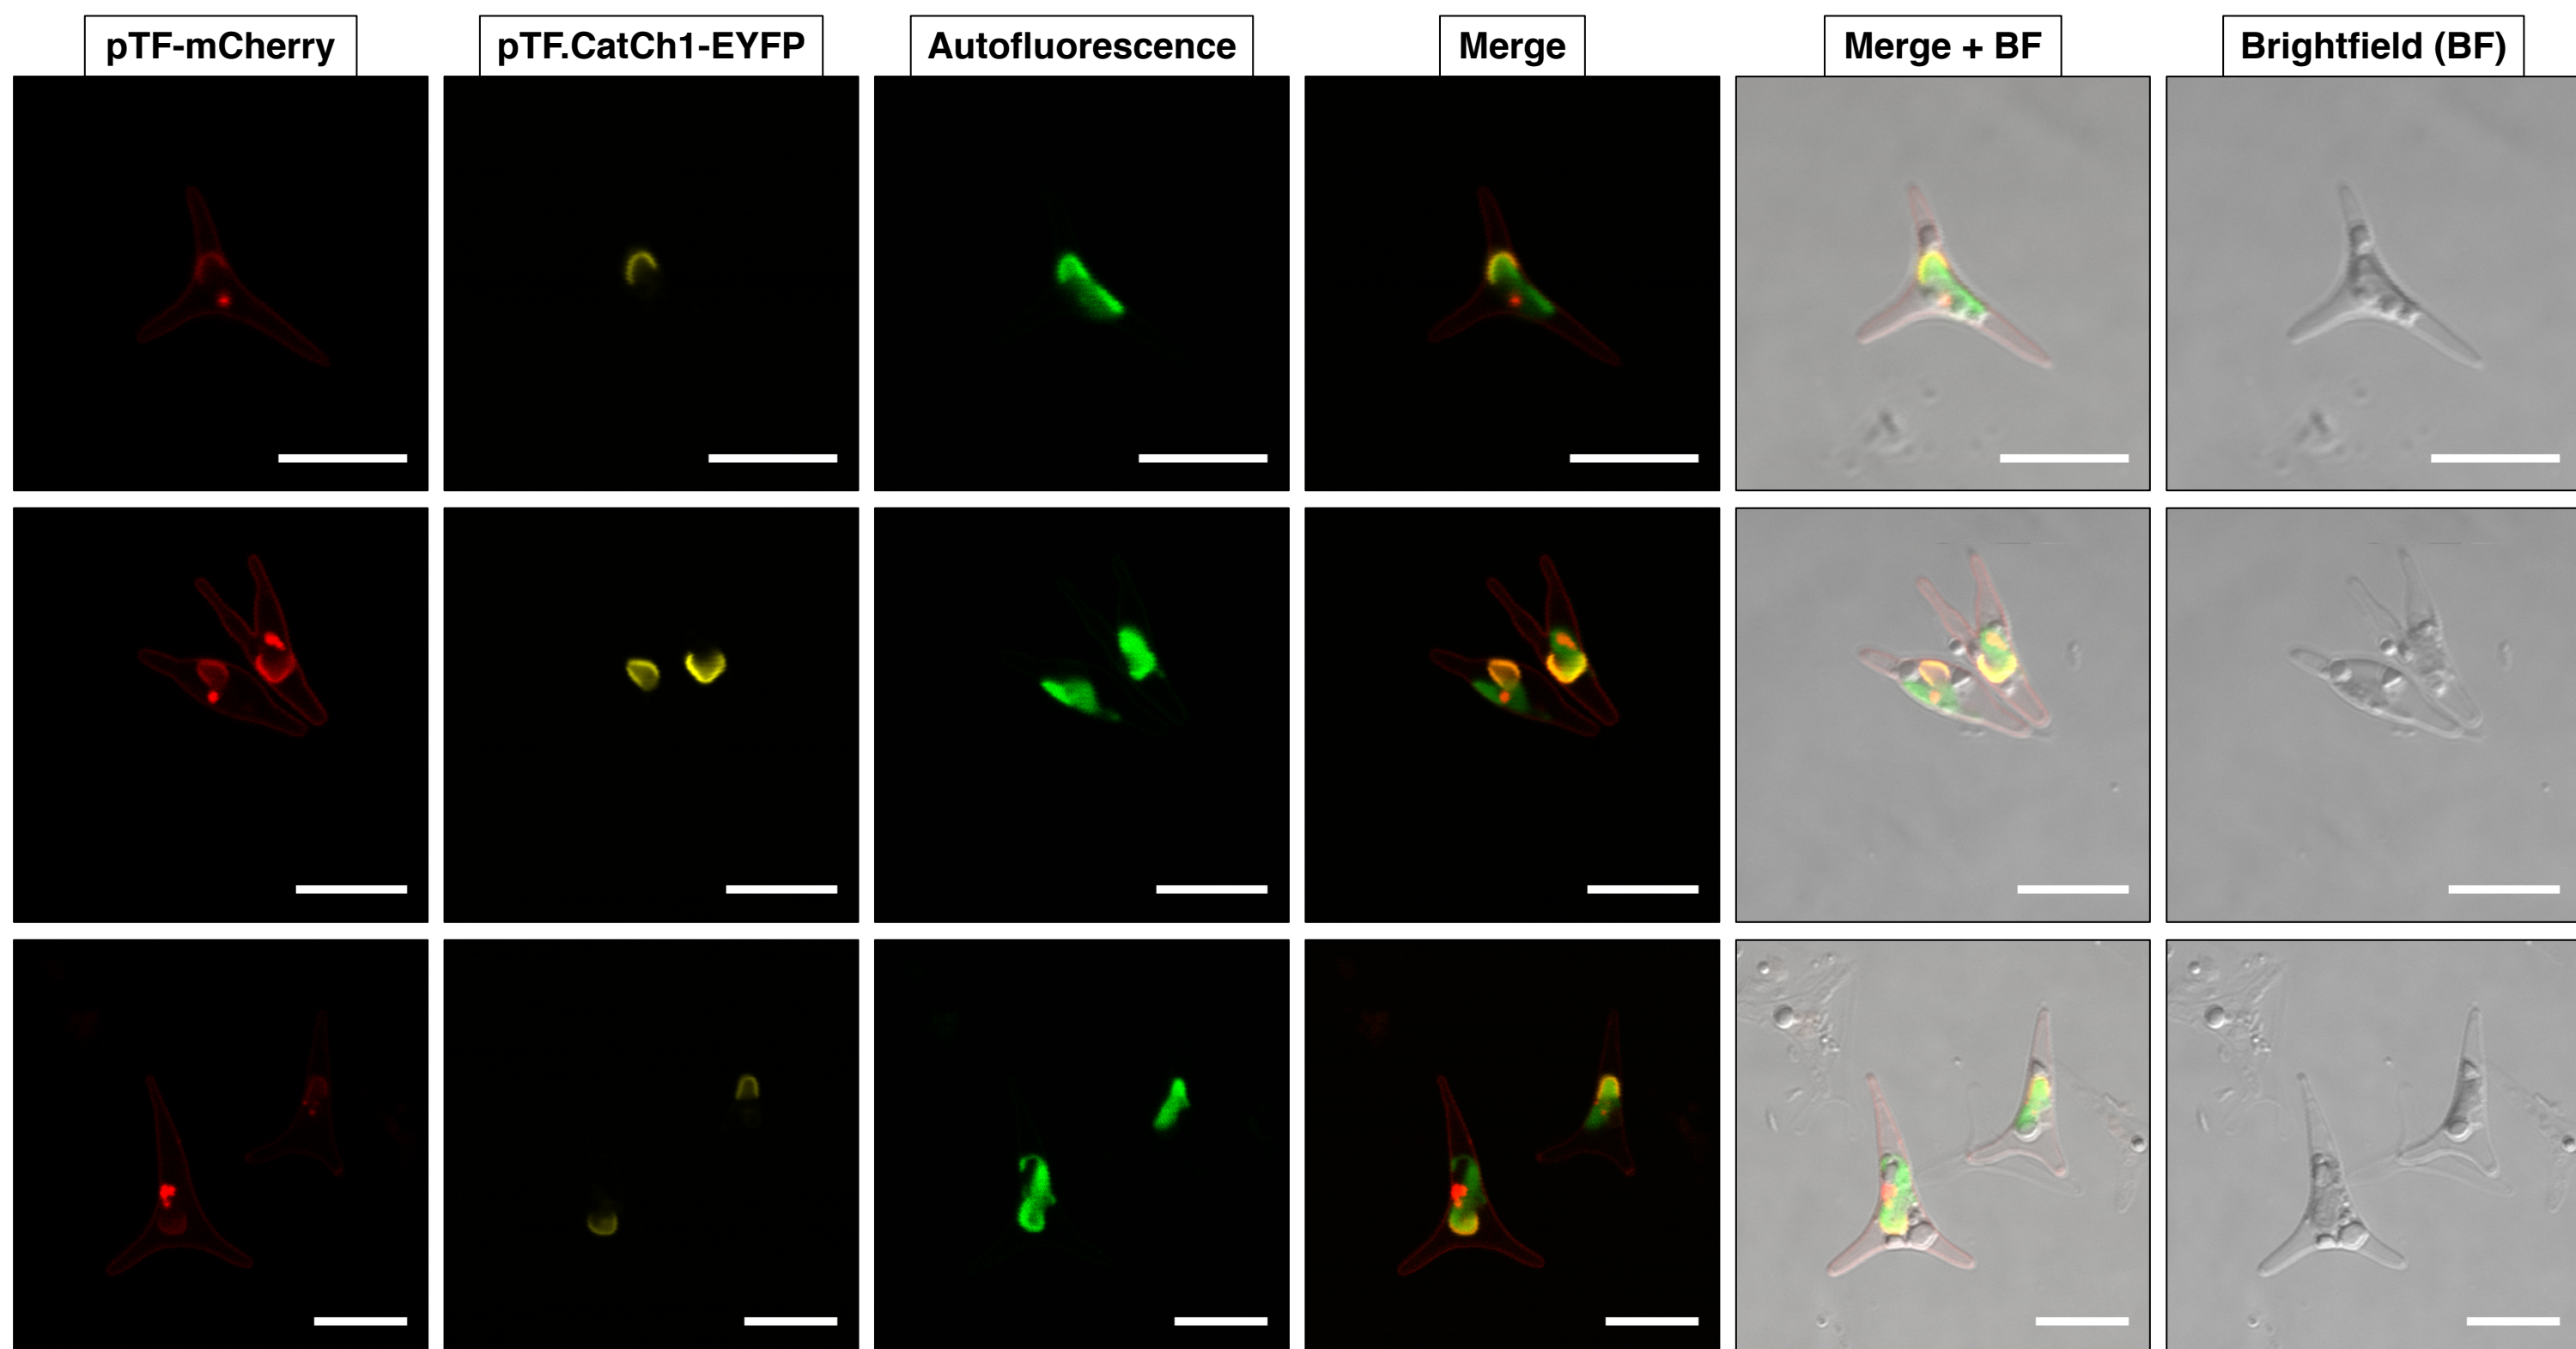

Supplement: supp [file elife-52770-supp-v1.zip]

pTF-mCherry

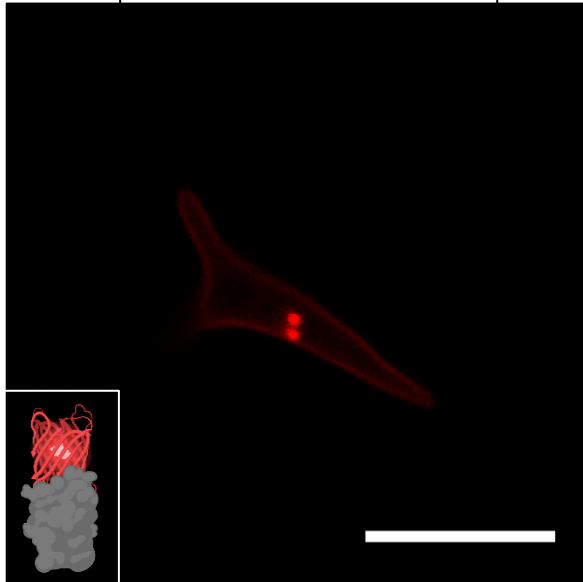

pTF.ap1-EYFP

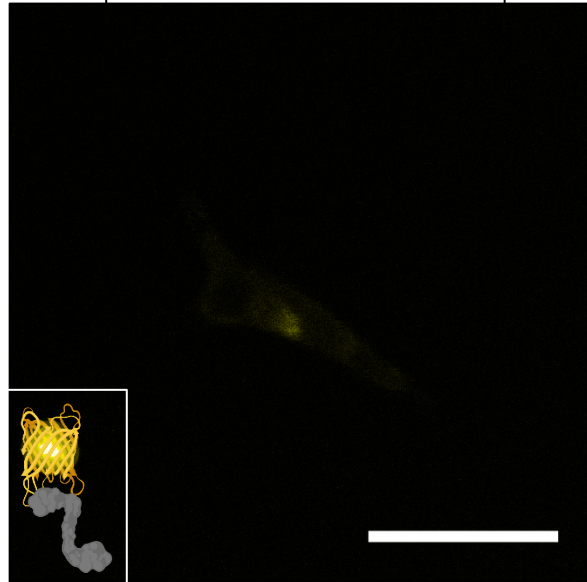

Merge

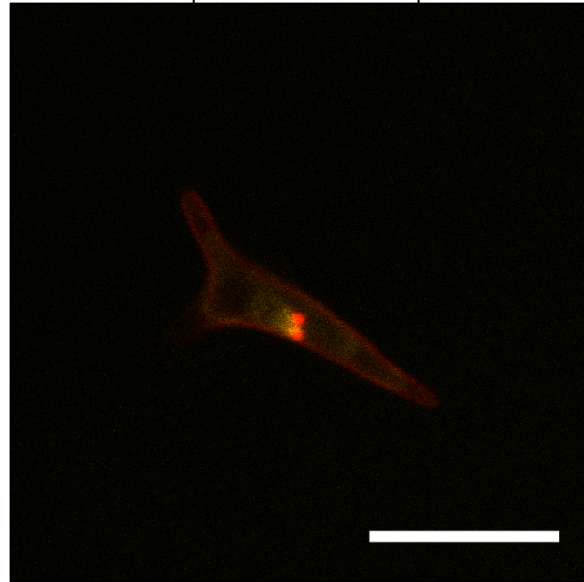

Merge + BF

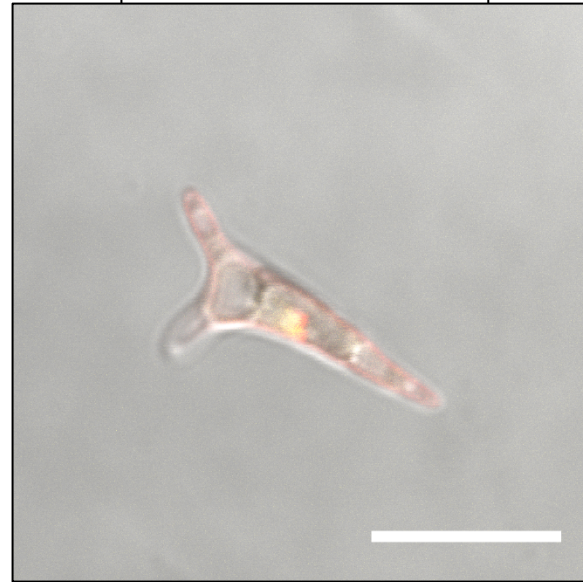

Brightfield (BF)

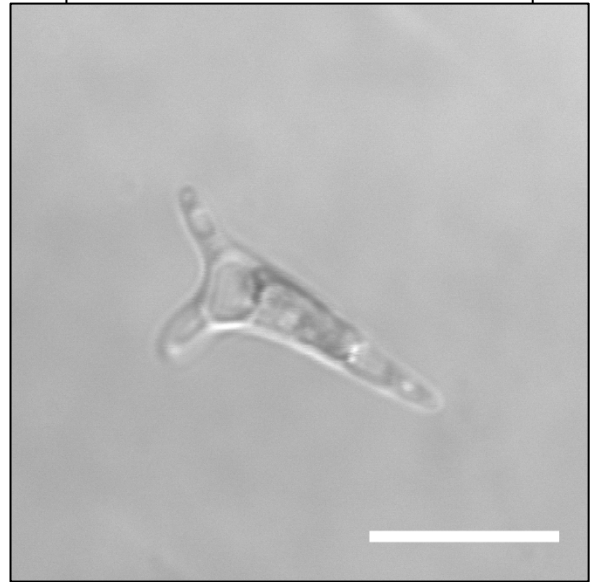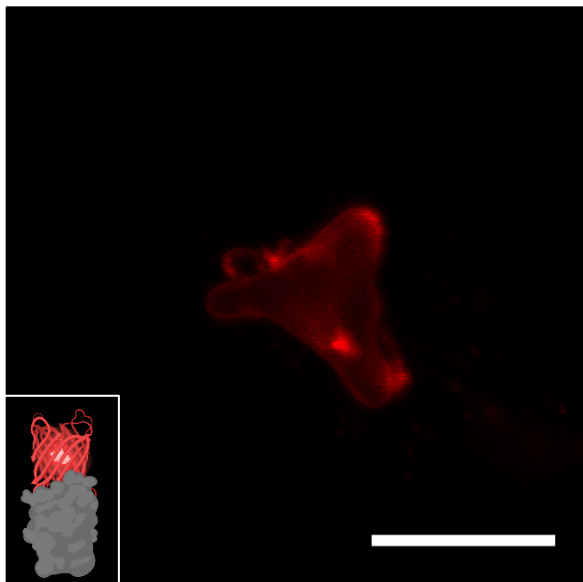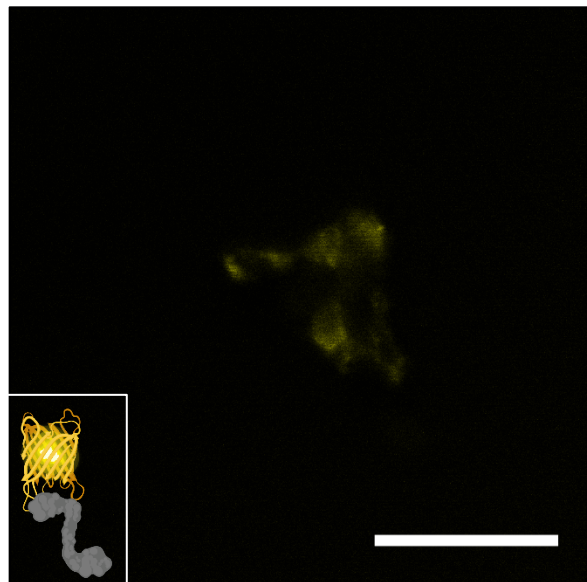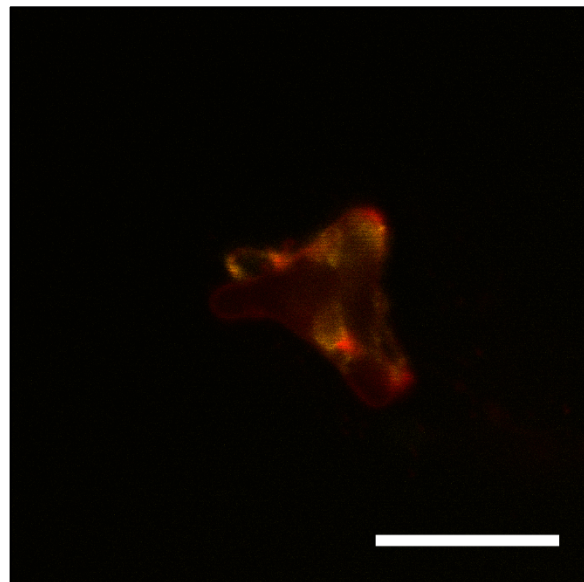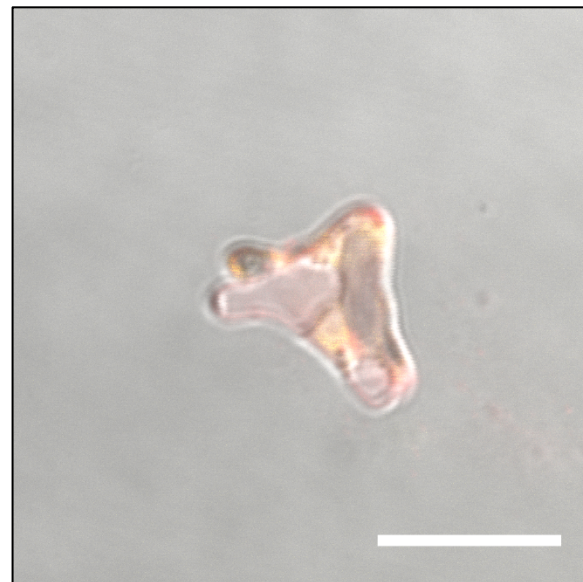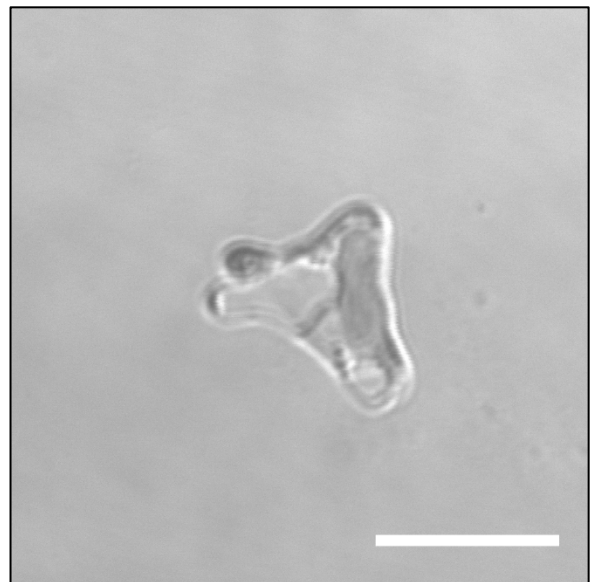

Supplement: supp [file elife-52770-supp-v1.zip]

A

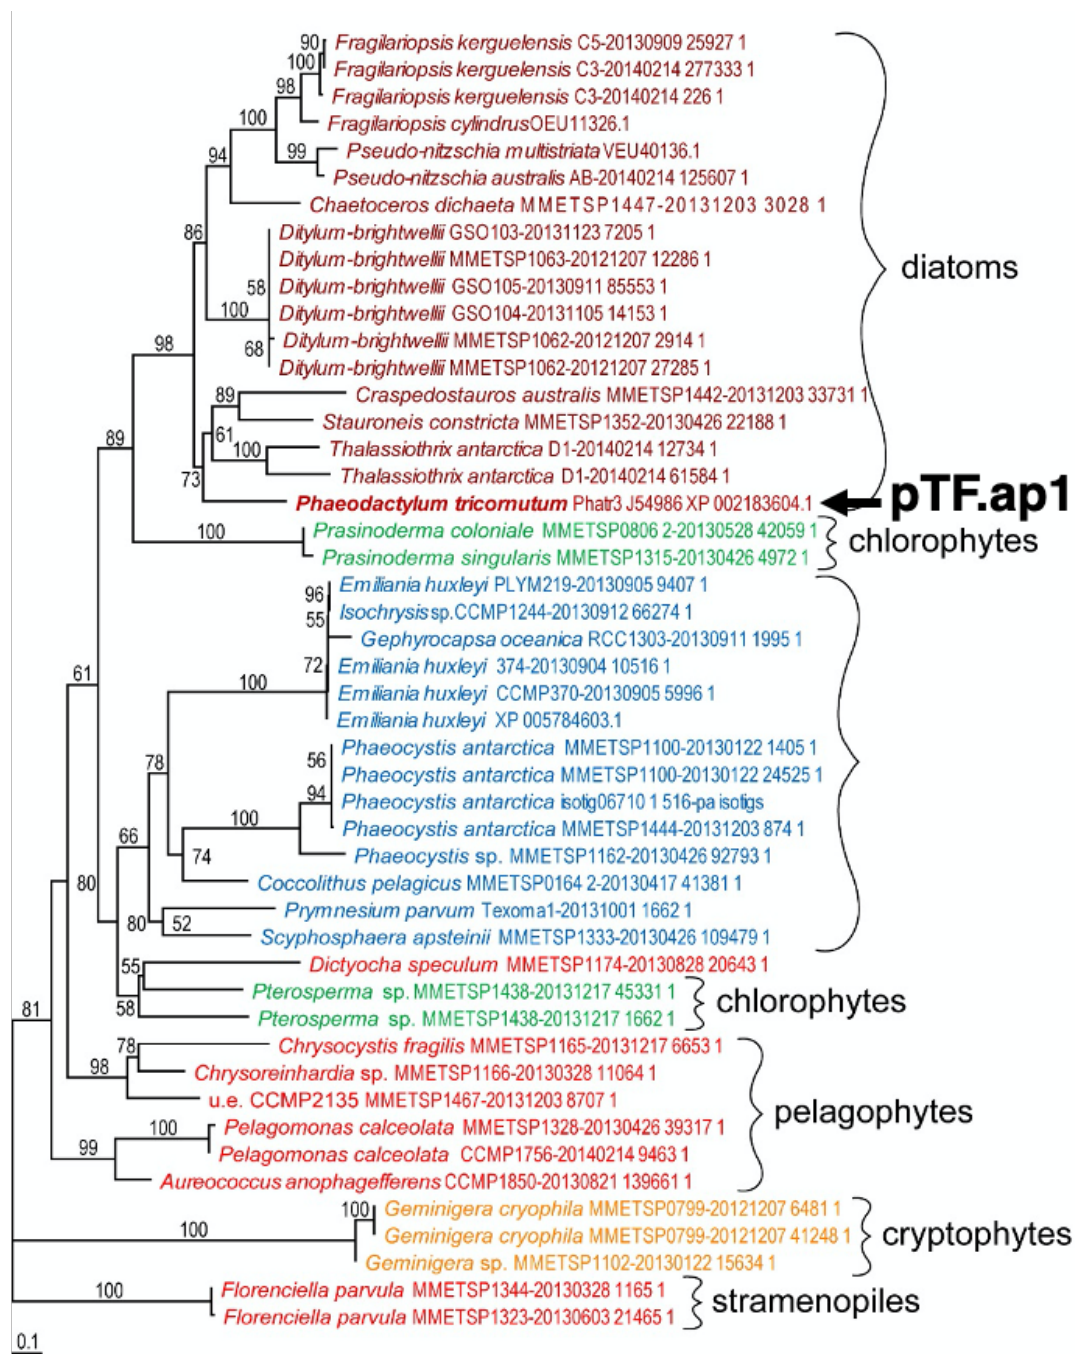

B

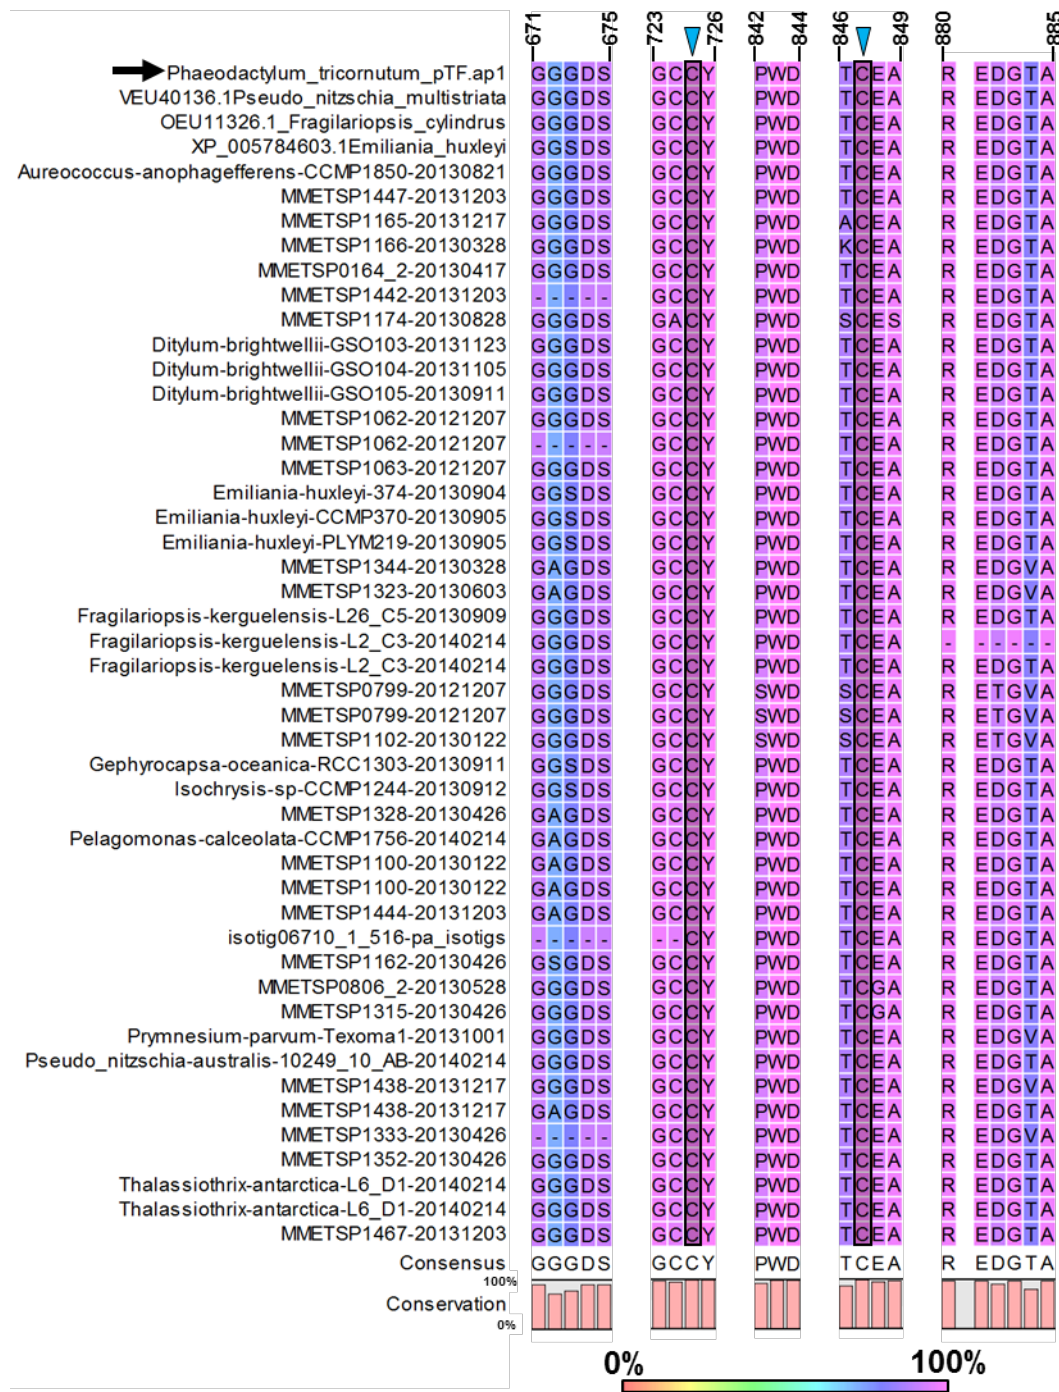

Supplement: supp [file elife-52770-supp-v1.zip]

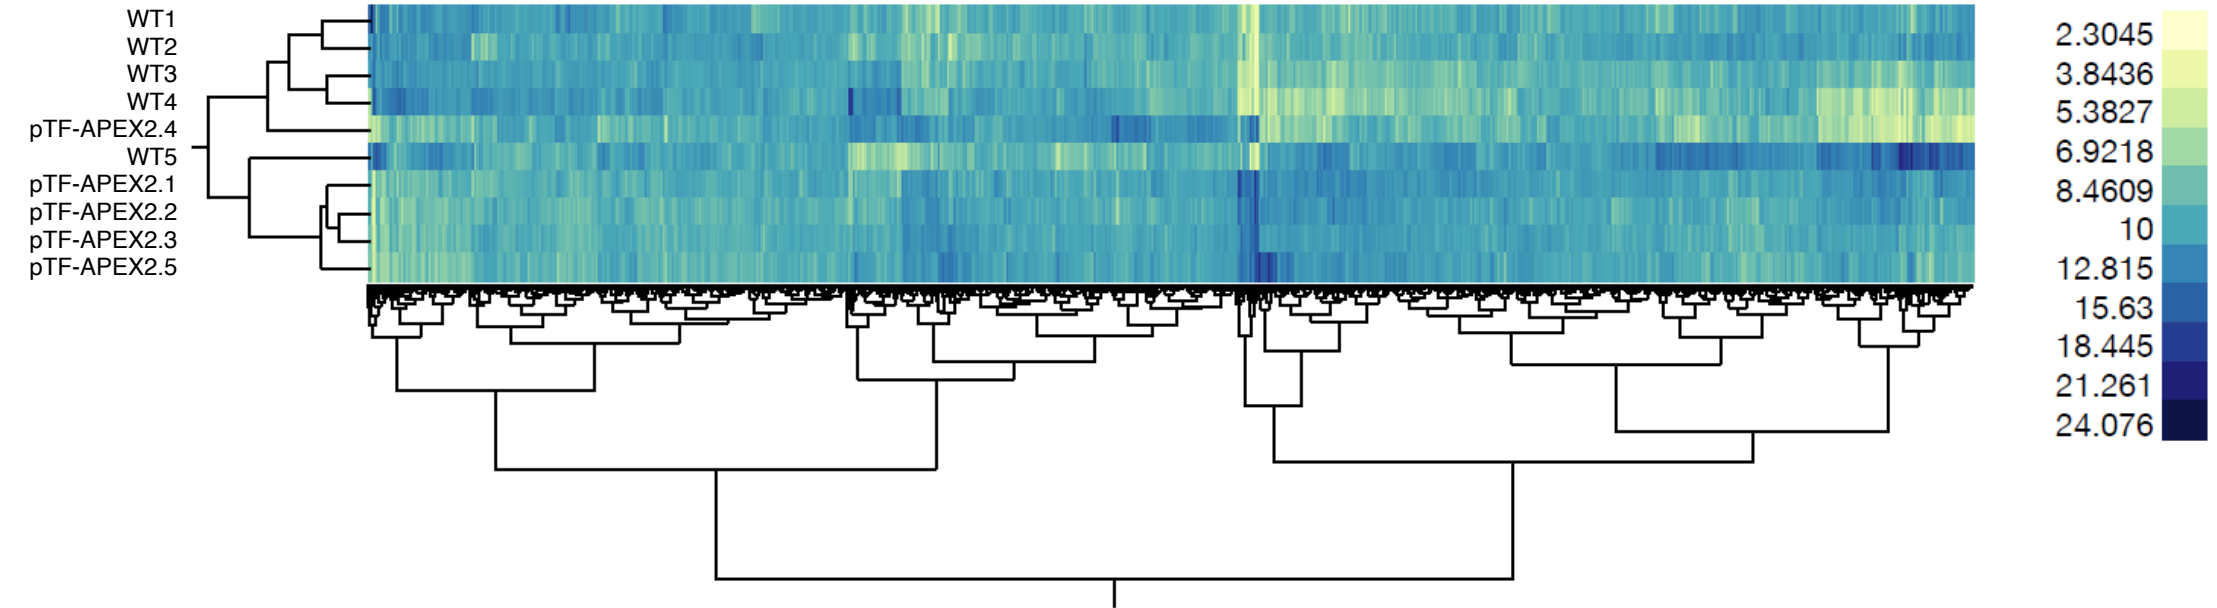

Supplement: supp [file elife-52770-supp-v1.zip]

# A

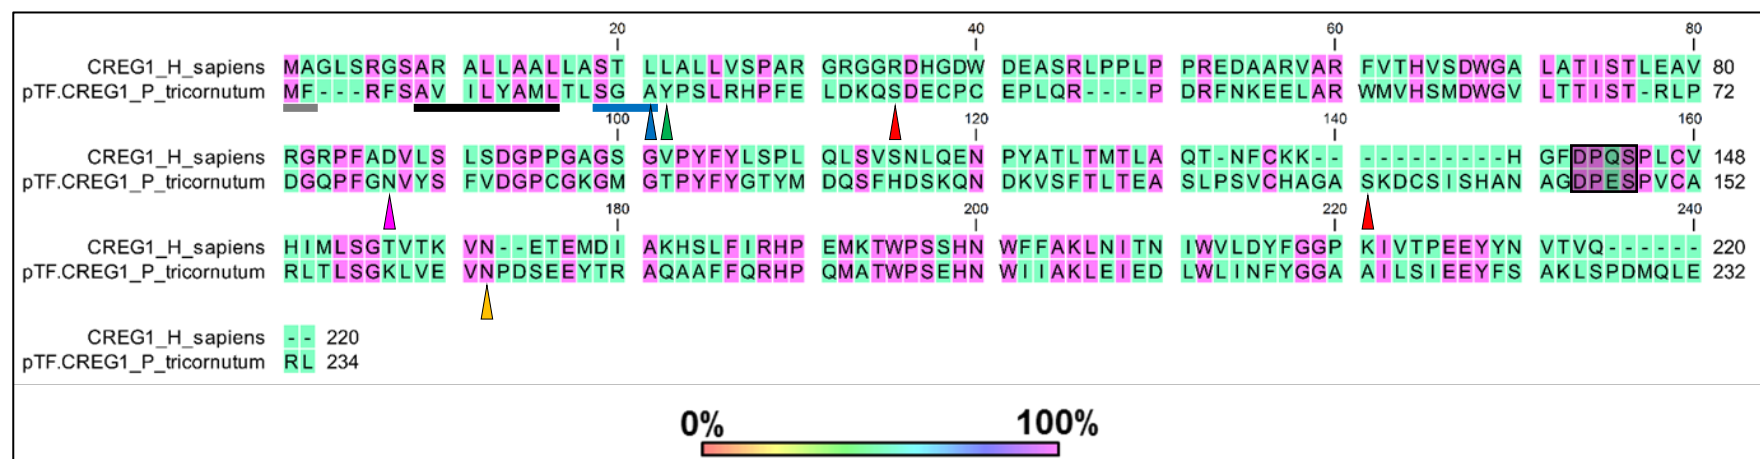

# B

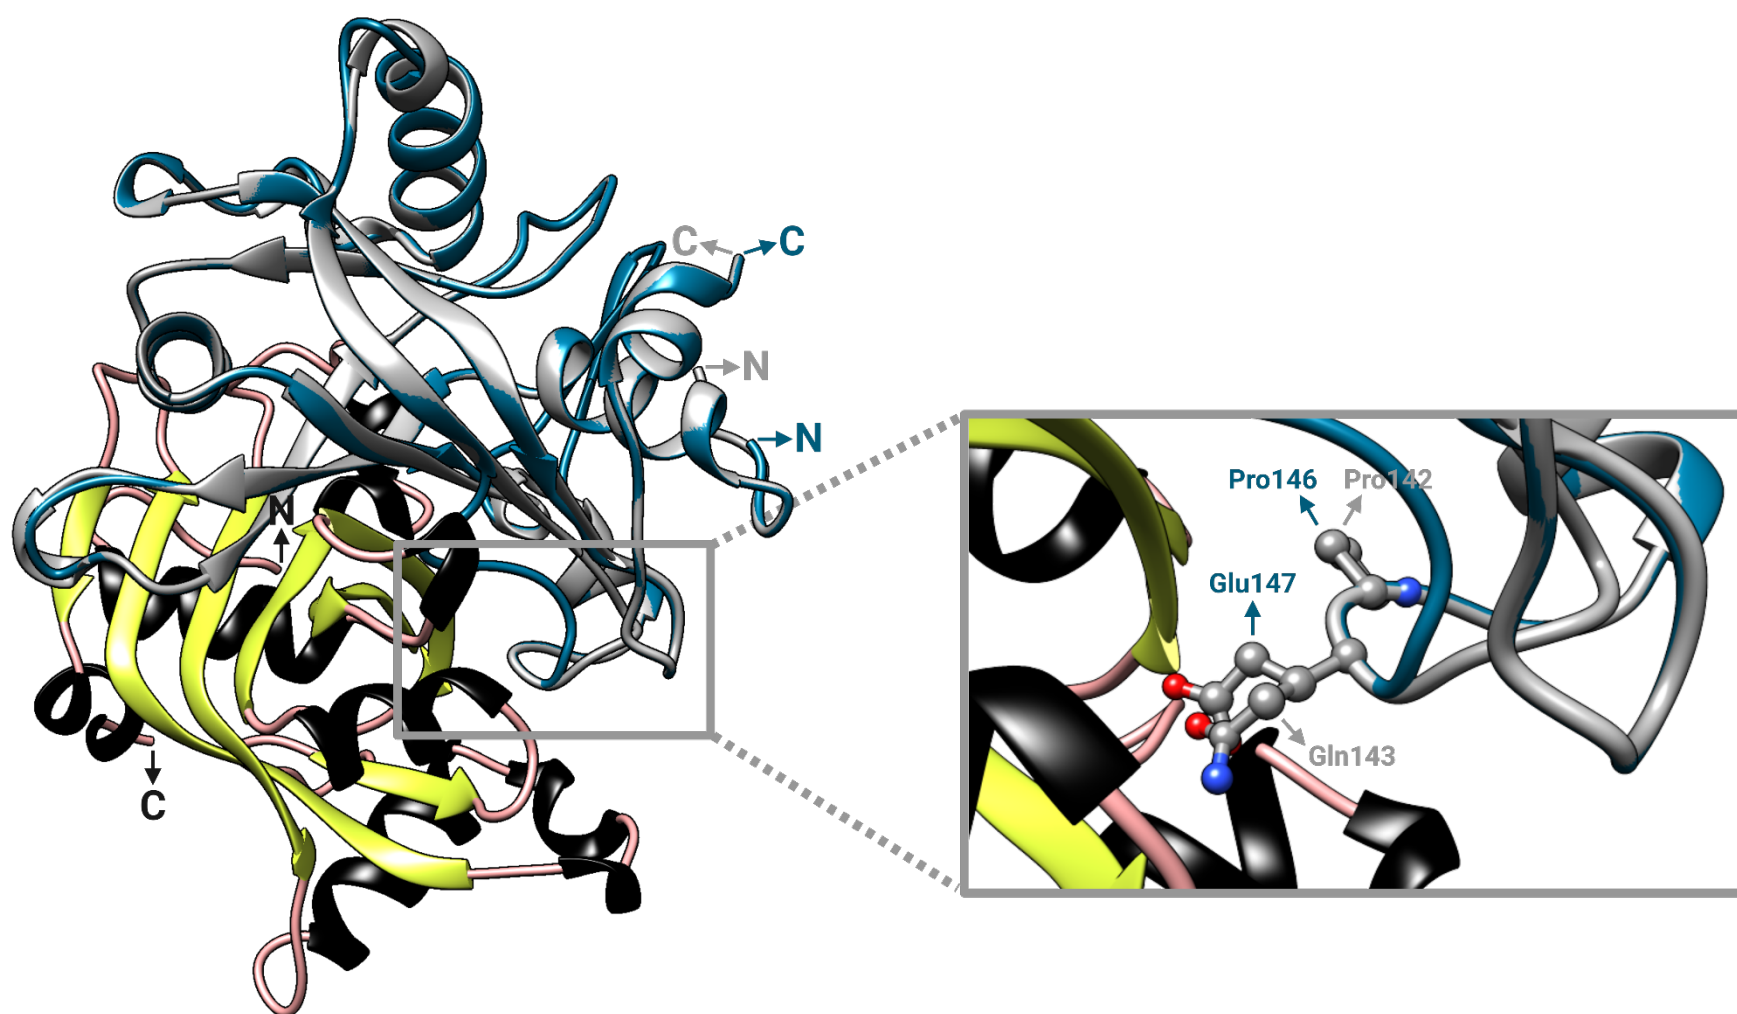

# C

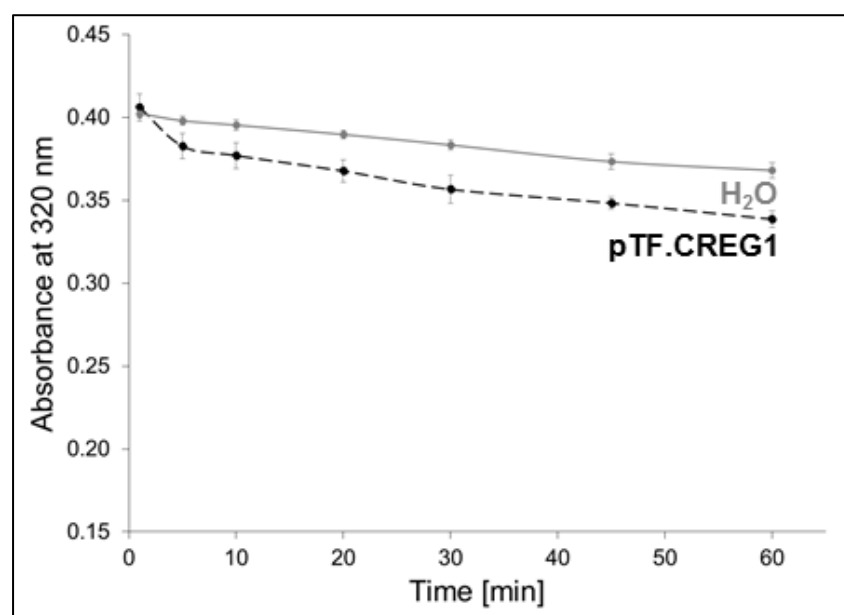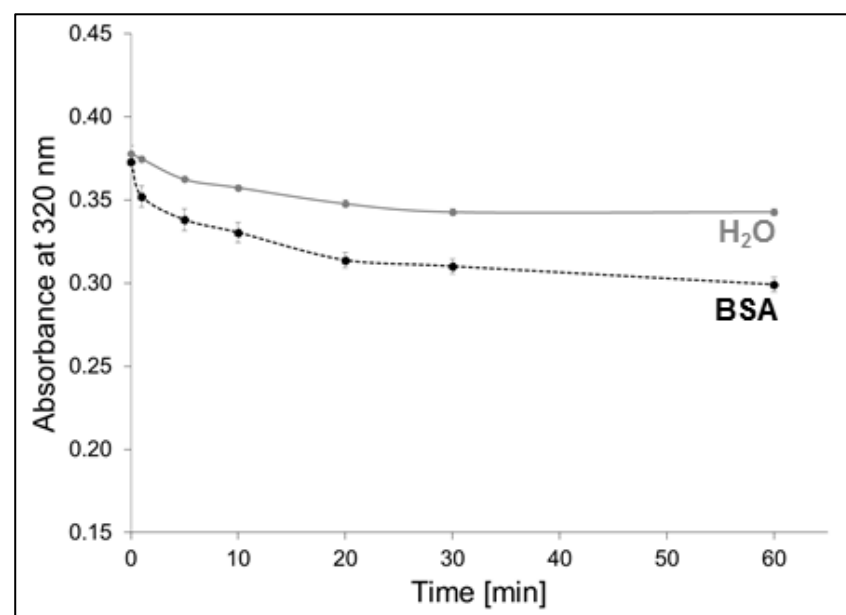

Supplement: supp [file elife-52770-supp-v1.zip]

# A

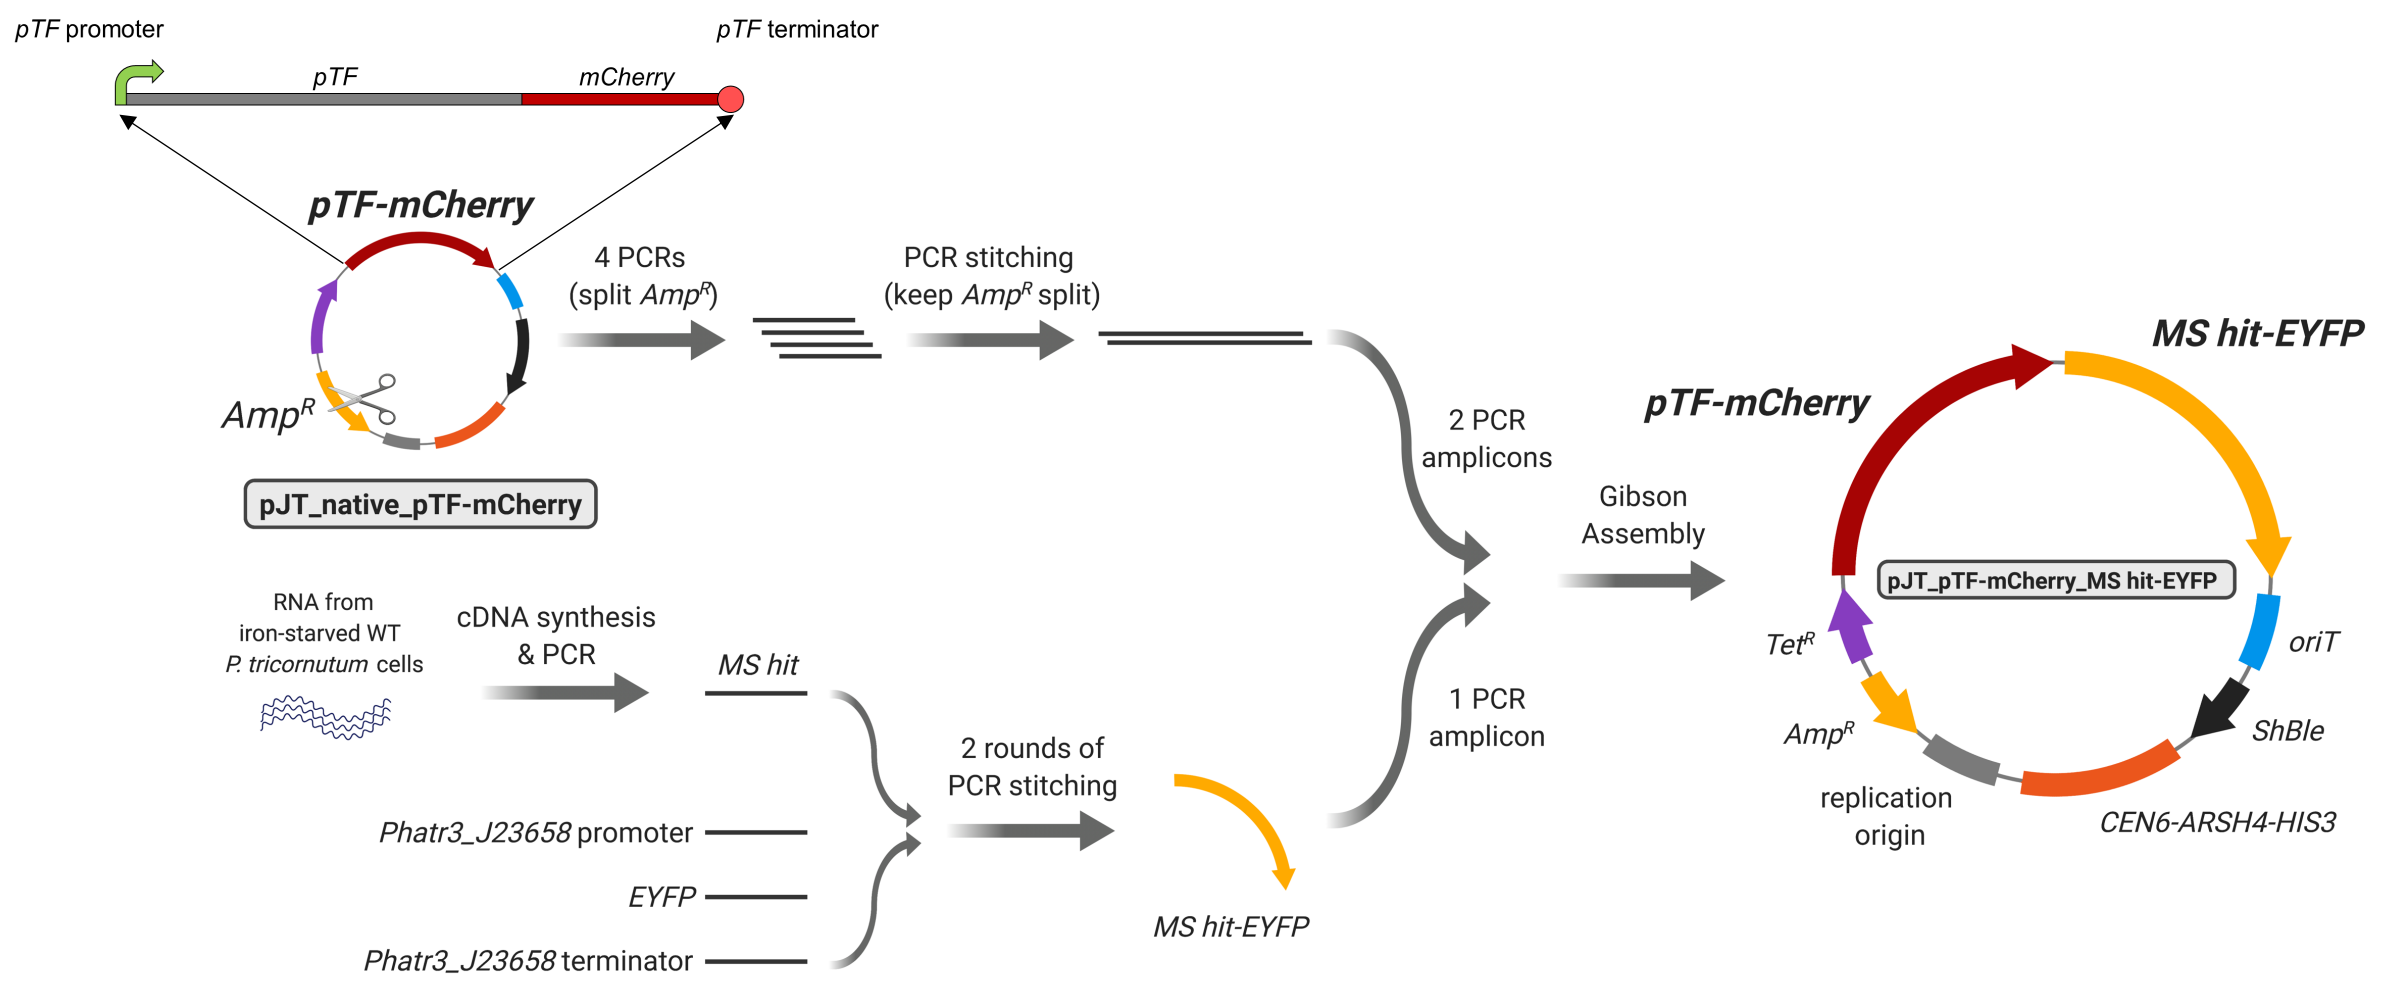

# B

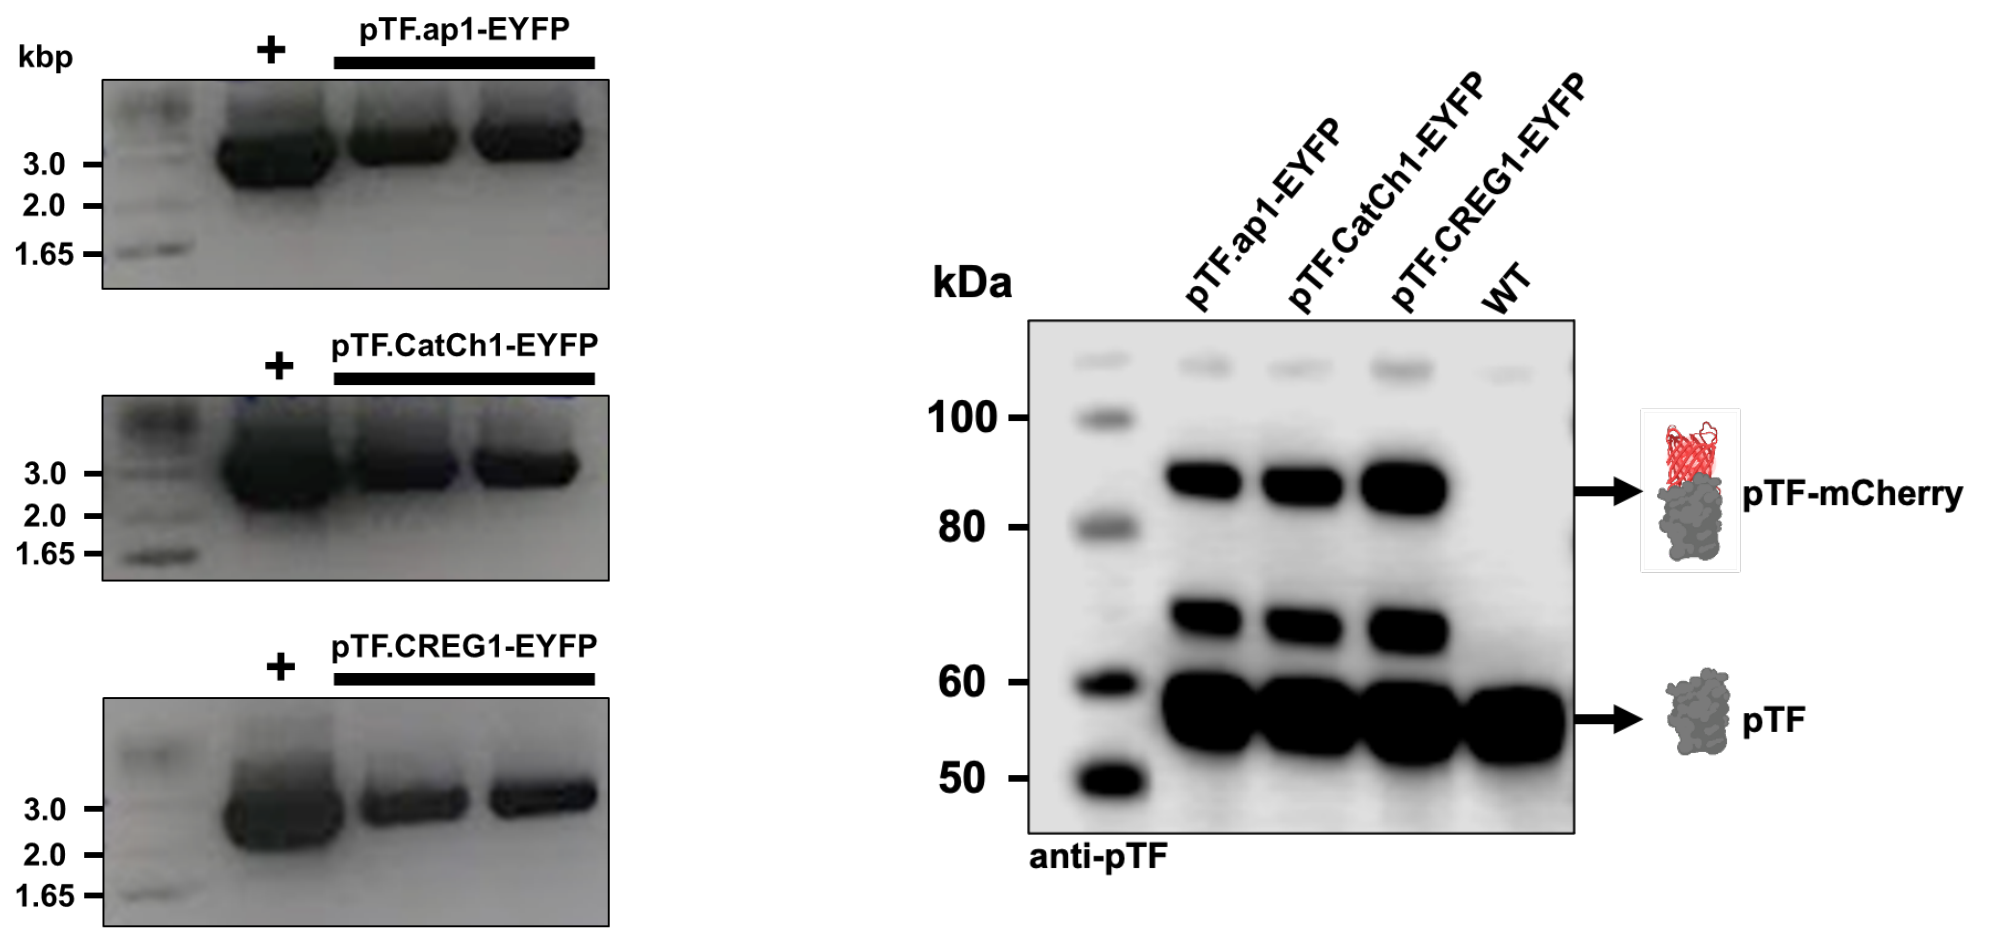

# C

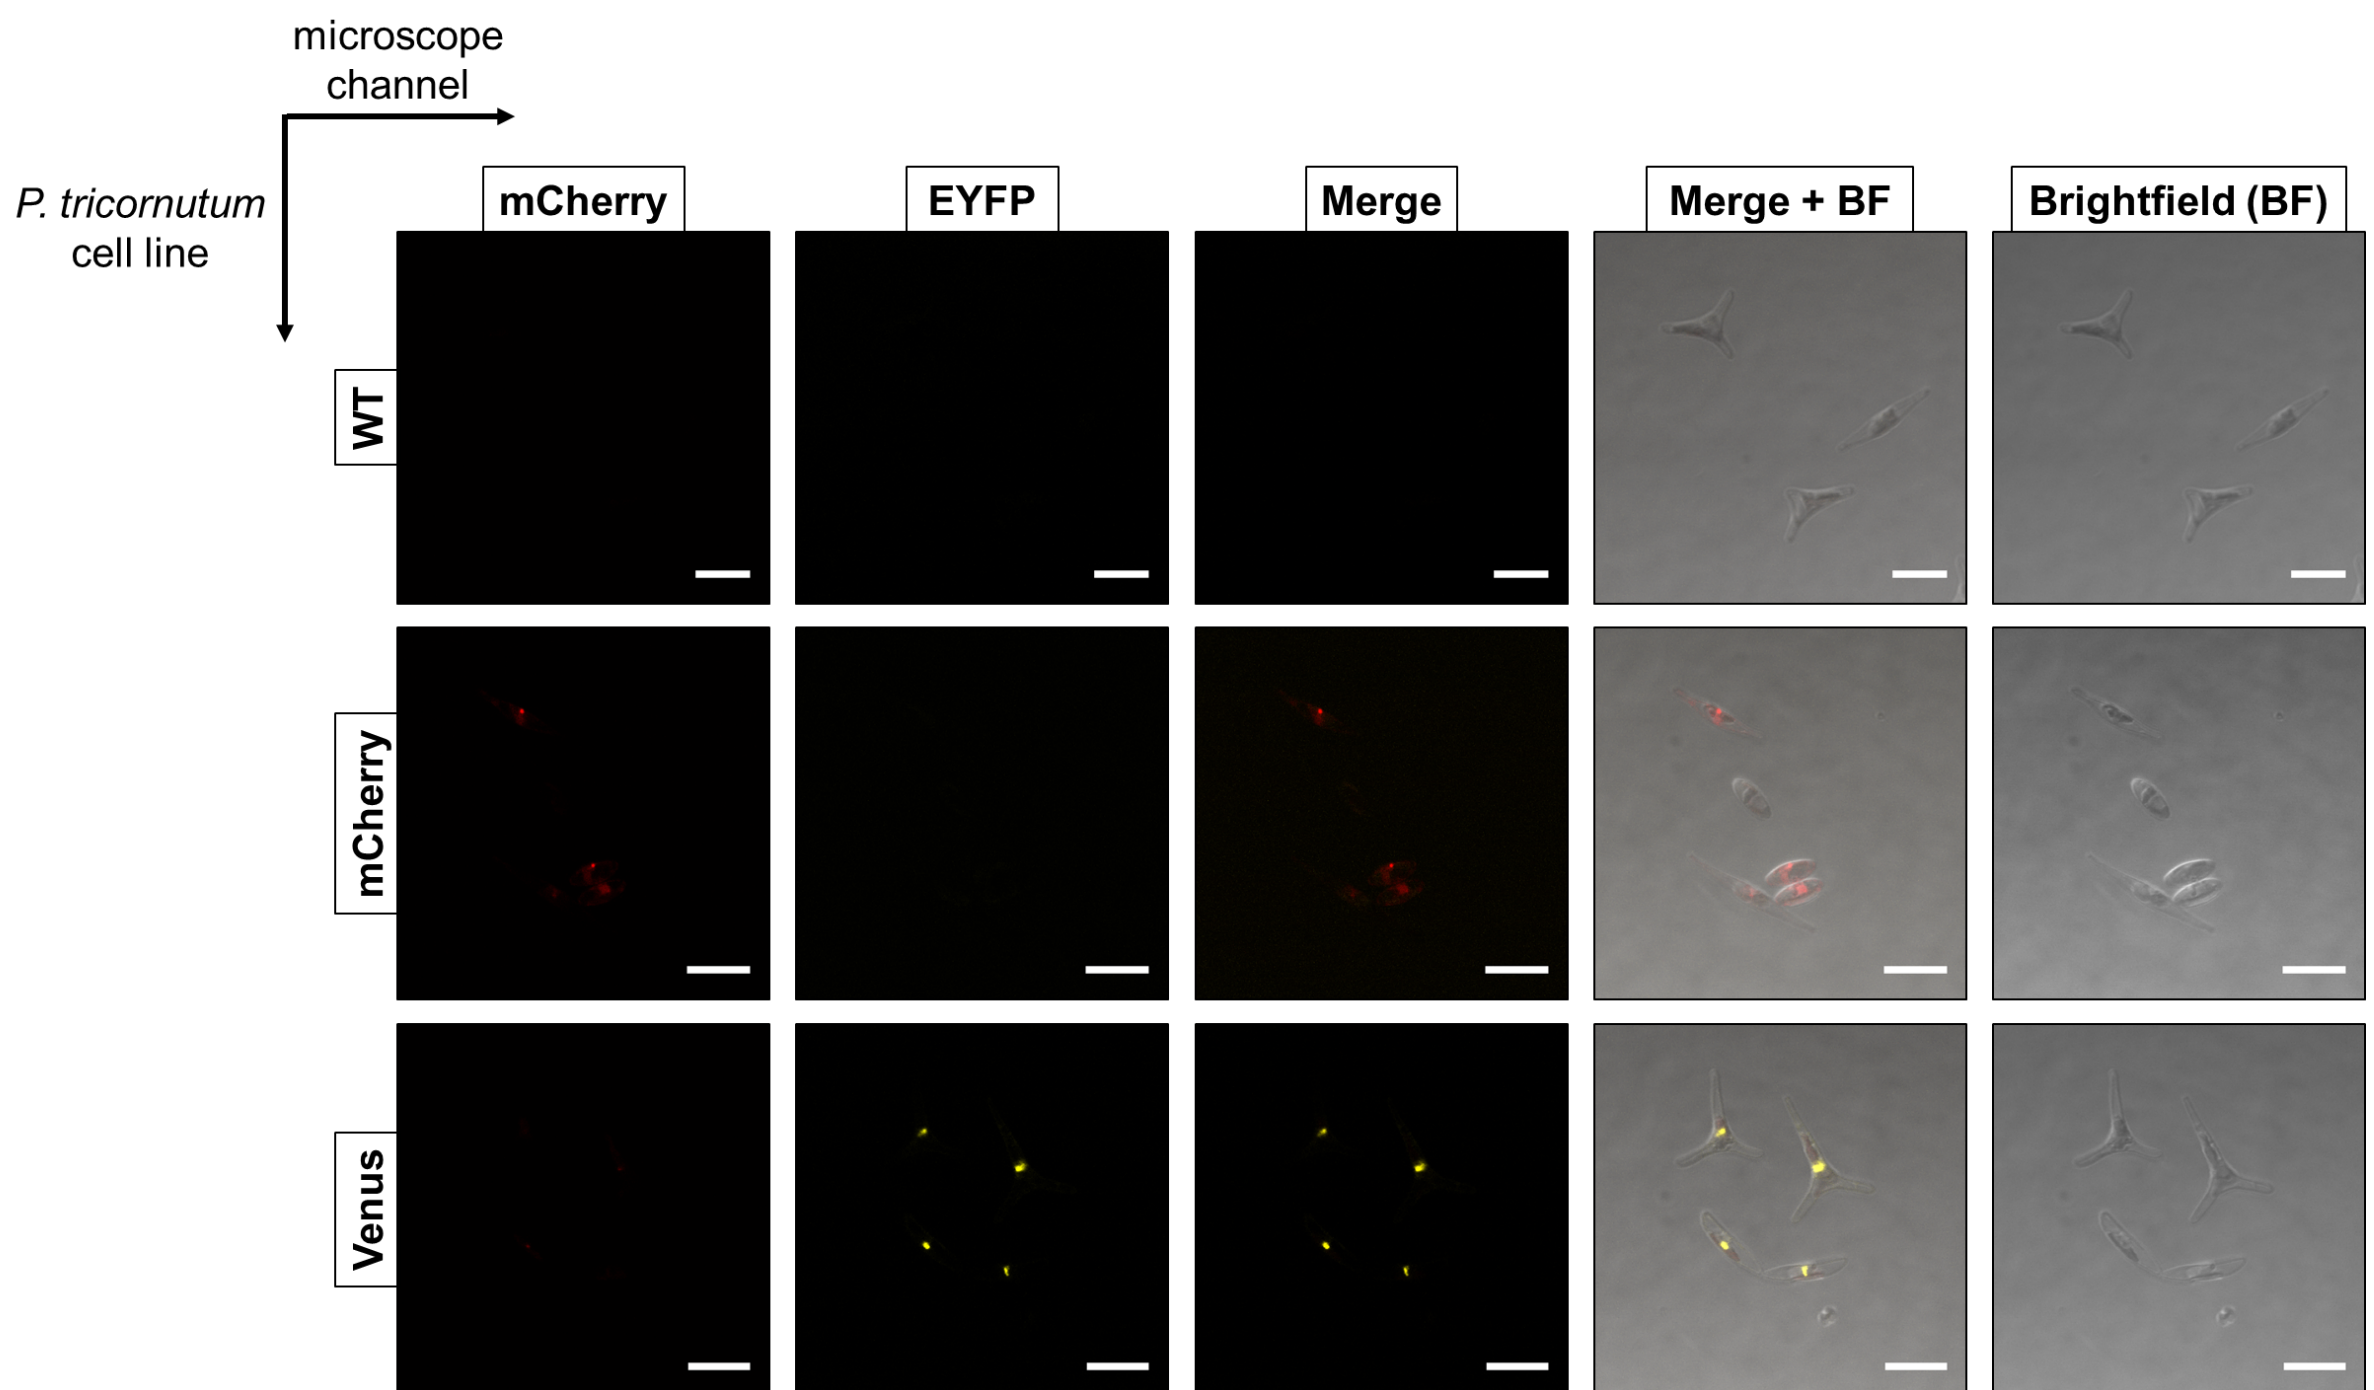

Supplement: supp [file elife-52770-supp-v1.zip]

**A**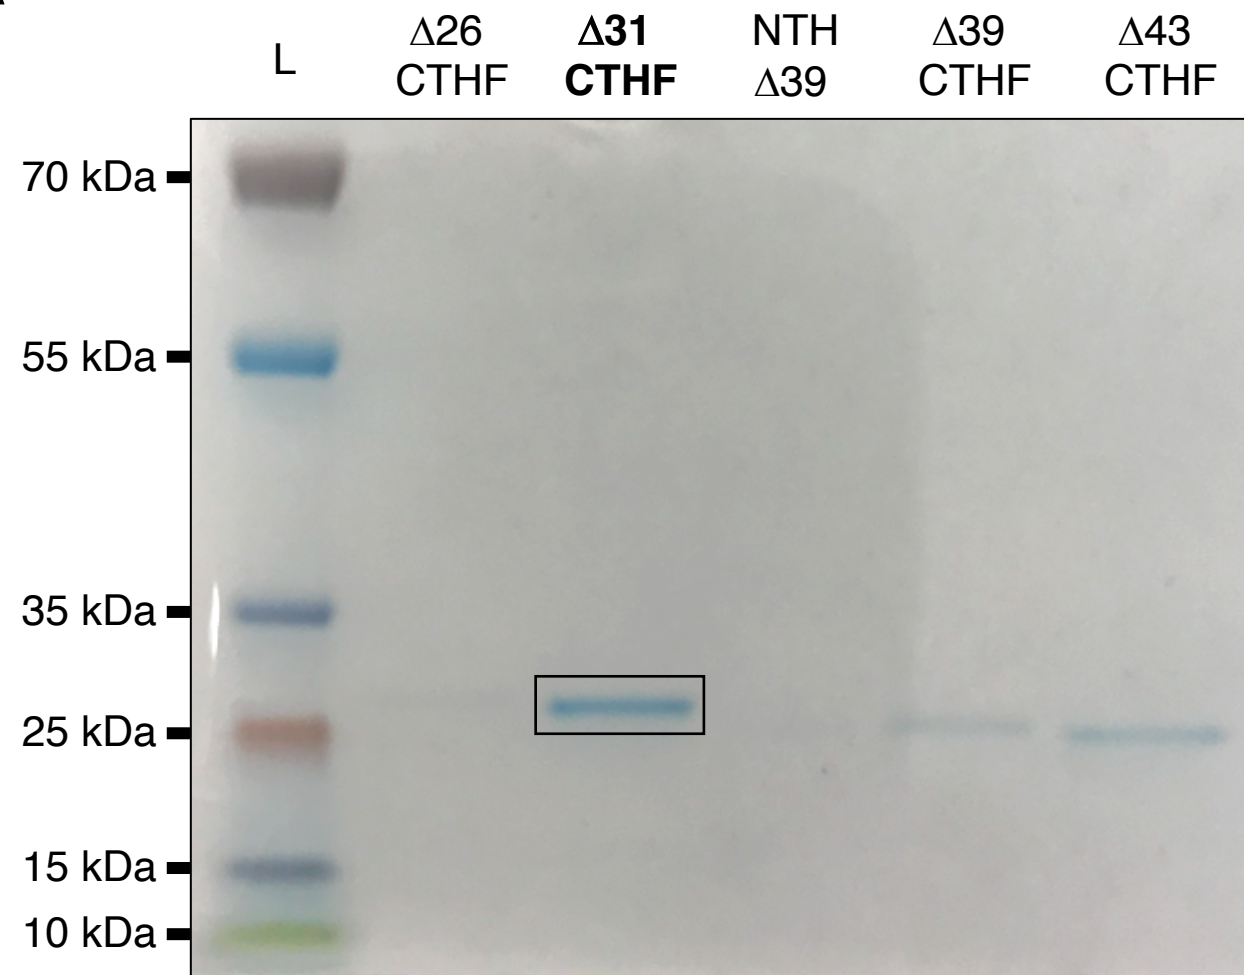**B**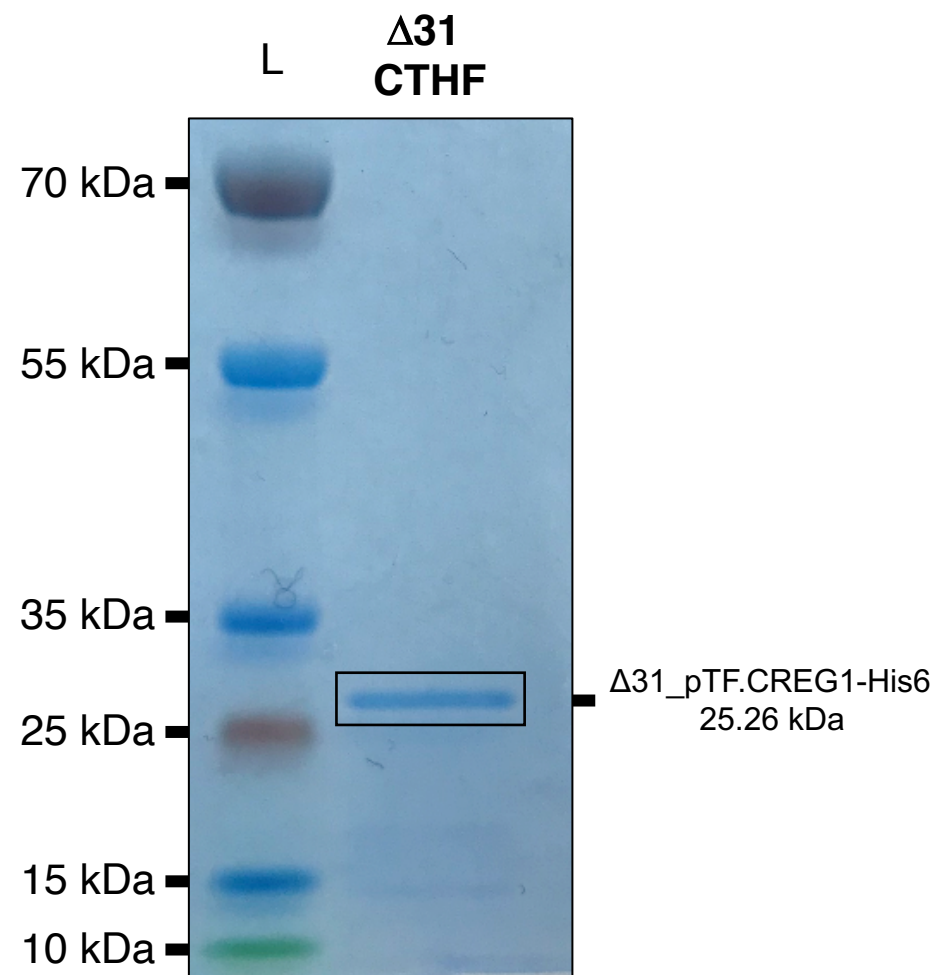

Supplement: supp [file elife-52770-supp-v1.zip]

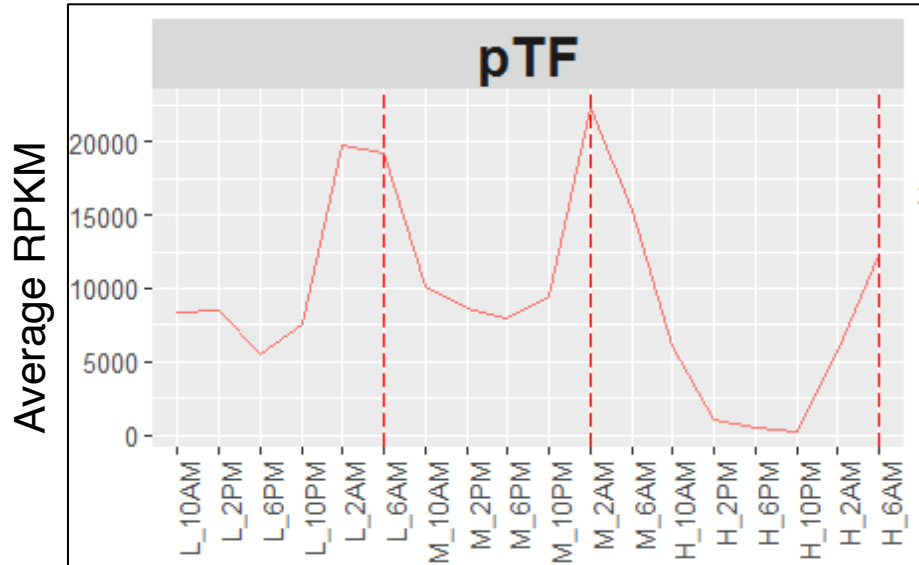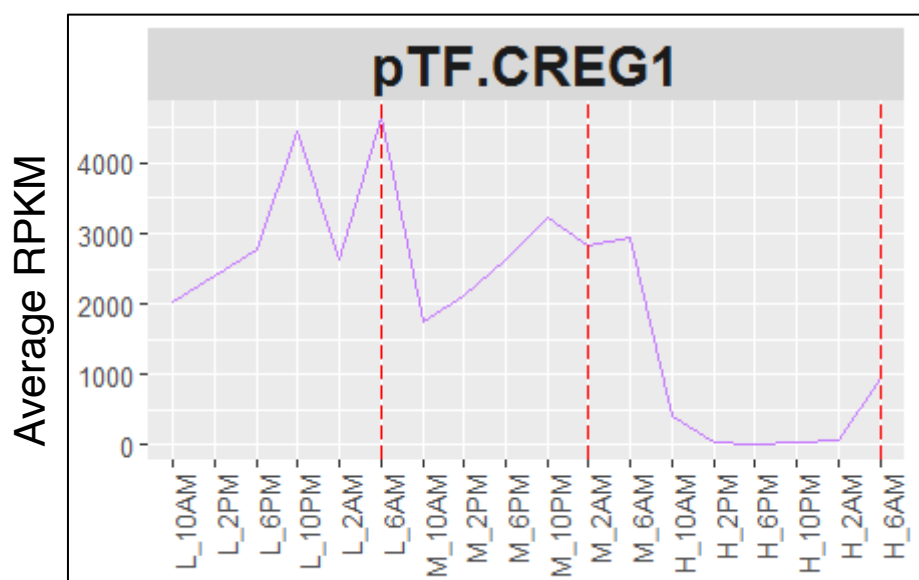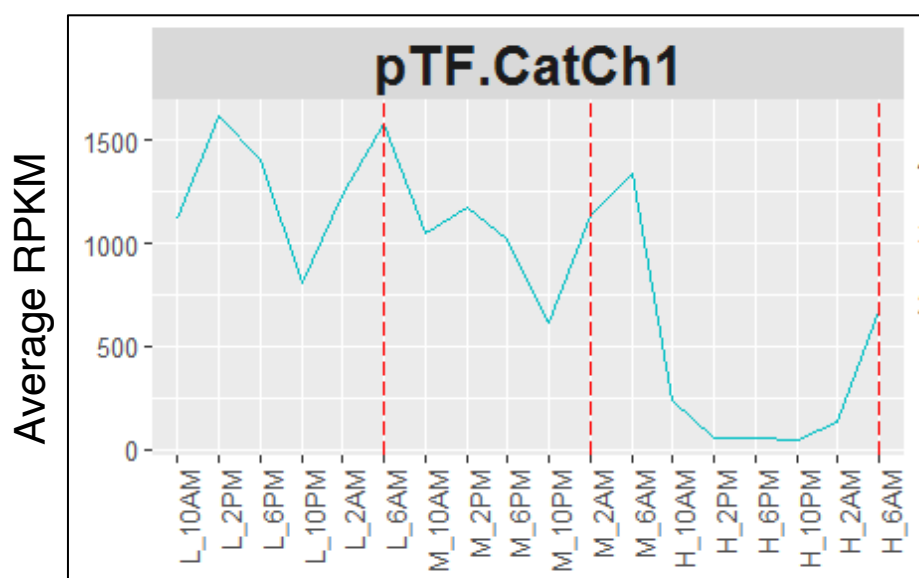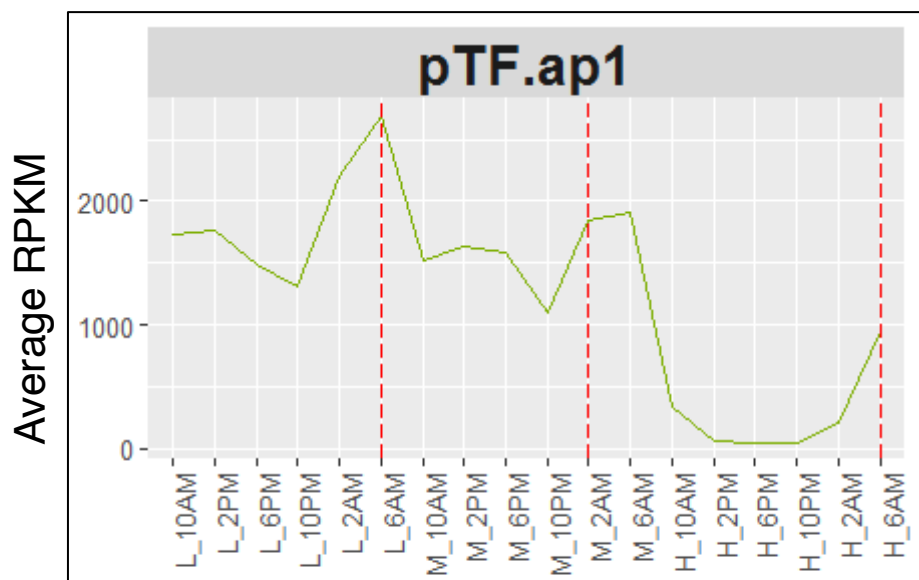

Growth conditions and sampling timepoints

Supplement: supp [file elife-52770-supp-v1.zip]
